# Supplementary material
Source: publisher figshare collection journal article supplement (https://tandf.figshare.com/ndownloader/files/14312555)
Supplement: Supplementary file 1 [file 14312555]

Table S1 The collection information of four species studied

| Species | Location | Latitude | Longitude | Time |
| --- | --- | --- | --- | --- |
| *Pseudophyllus titan* | Mengla, Yunnan | N 21°19′ | E 101°69′ | May-2015 |
| *Sphagniana ussuriana* | Changbai Mountains, Jilin | N 42°45′ | E 127°96′ | Jul-2016 |
| *Oecanthus sinensis* | Huangshan, Anhui | N 30°16′ | E 118°15′ | Jun-2016 |
| *Truljalia hibinonis* | Huangshan, Anhui | N 30°16′ | E 118°15′ | Jun-2016 |

Table S2 Annotation of *Pseudophyllus titan* mitochondrial genomes

| Feature | Strand | Position | Initiation codon | Stop codon | Anticodon |
| --- | --- | --- | --- | --- | --- |
| *trnM* | J | 1-68(2) |  |  | CAT |
| *trnI* | J | 71-134(0) |  |  | GAT |
| *trnQ* | N | 135-203(66) |  |  | TTG |
| *nad2* | J | 270-1295(6) | ATT | TAA |  |
| *trnW* | J | 1302-1367(-8) |  |  | TCA |
| *trnC* | N | 1360-1426(35) |  |  | GCA |
| *trnY* | N | 1462-1529(-8) |  |  | GTA |
| *cox1* | J | 1522-3066(-5) | ATT | TAA |  |
| *trnL(UUR)* | J | 3062-3124(0) |  |  | TAA |
| *cox2* | J | 3125-3814(8) | ATG | TAA |  |
| *trnK* | J | 3823-3892(-1) |  |  | CTT |
| *trnD* | J | 3892-3958(0) |  |  | GTC |
| *atp8* | J | 3959-4120(-4) | ATT | TAA |  |
| *atp6* | J | 4117-4797(1) | ATA | TAA |  |
| *cox3* | J | 4799-5590(6) | ATG | TAA |  |
| *trnG* | J | 5597-5661(-3) |  |  | TCC |
| *nad3* | J | 5659-6015(29) | ATA | TAA |  |
| *trnA* | J | 6045-6108(8) |  |  | TGC |
| *trnR* | J | 6117-6180(0) |  |  | TCG |
| *trnN* | J | 6181-6247(0) |  |  | GTT |
| *trnS(AGN)* | J | 6248-6314(9) |  |  | GCT |
| *trnE* | J | 6324-6390(39) |  |  | TTC |
| *trnF* | N | 6430-6497(9) |  |  | GAA |
| *nad5* | N | 6507-8246(0) | ATT | TAA |  |
| *trnH* | N | 8247-8313(0) |  |  | GTG |
| *nad4* | N | 8314-9655(-7) | ATG | T |  |
| *nad4L* | N | 9649-9945(5) | ATG | TAA |  |
| *trnT* | J | 9951-10013(-1) |  |  | TGT |
| *trnP* | N | 10013-10080(3) |  |  | TGG |
| *nad6* | J | 10084-10620(17) | ATG | TAA |  |
| *cob* | J | 10638-11774(28) | ATG | TAA |  |
| *trnS(UCN)* | J | 11803-11870(111) |  |  | TGA |
| *nad1* | N | 11982-12923(3) | ATT | TAA |  |
| *trnL(CUN)* | N | 12927-12991(0) |  |  | TAG |
| *rrnL* | N | 12992-14325(0) |  |  |  |
| *trnV* | N | 14326-14396(0) |  |  | TAC |
| *rrnS* | N | 14397-15232(0) |  |  |  |
| Control region | - | 15232-16227 |  |  |  |

Table S3 Annotation of *Sphagniana ussuriana* mitochondrial genomes

| Feature | Strand | Position | Initiation codon | Stop codon | Anticodon |
| --- | --- | --- | --- | --- | --- |
| *trnI* | J | 1-66(-3) |  |  | GAT |
| *trnQ* | N | 64-132(15) |  |  | TTG |
| *trnM* | J | 148-212(0) |  |  | CAT |
| *nad2* | J | 213-1241(-2) | ATC | TAA |  |
| *trnW* | J | 1240-1305(-8) |  |  | TCA |
| *trnC* | N | 1298-1360(0) |  |  | GCA |
| *trnY* | N | 1361-1426(-8) |  |  | GTA |
| *cox1* | J | 1419-2958(0) | ATT | T |  |
| *trnL(UUR)* | J | 2959-3023(1) |  |  | TAA |
| *cox2* | J | 3025-3715(0) | ATG | T |  |
| *trnK* | J | 3716-3785(-1) |  |  | CTT |
| *trnD* | J | 3785-3852(0) |  |  | GTC |
| *atp8* | J | 3853-4014(-7) | ATT | TAA |  |
| *atp6* | J | 4008-4683(0) | ATG | T |  |
| *cox3* | J | 4684-5472(3) | ATG | TAA |  |
| *trnG* | J | 5476-5539(0) |  |  | TCC |
| *nad3* | J | 5540-5893(-2) | ATC | TAG |  |
| *trnA* | J | 5892-5954(0) |  |  | TGC |
| *trnR* | J | 5955-6017(0) |  |  | TCG |
| *trnN* | J | 6018-6083(0) |  |  | GTT |
| *trnS(AGN)* | J | 6084-6150(1) |  |  | GCT |
| *trnE* | J | 6152-6217(-2) |  |  | TTC |
| *trnF* | N | 6216-6283(0) |  |  | GAA |
| *nad5* | N | 6284-8015(0) | ATT | T |  |
| *trnH* | N | 8016-8080(0) |  |  | GTG |
| *nad4* | N | 8081-9419(-7) | ATG | T |  |
| *nad4L* | N | 9413-9709(1) | ATG | TAA |  |
| *trnT* | J | 9711-9774(-1) |  |  | TGT |
| *trnP* | N | 9774-9838(1) |  |  | TGG |
| *nad6* | J | 9840-10367(-1) | ATT | TAA |  |
| *cob* | J | 10367-11521(2) | ATG | TAA |  |
| *trnS(UCN)* | J | 11524-11591(16) |  |  | TGA |
| *nad1* | N | 11608-12552(3) | ATG | TAA |  |
| *trnL(CUN)* | N | 12556-12619(0) |  |  | TAG |
| *rrnL* | N | 12620-13925(0) |  |  |  |
| *trnV* | N | 13926-13995(0) |  |  | TAC |
| *rrnS* | N | 13996-14777(0) |  |  |  |
| Control region | - | 14777-15858 |  |  |  |

Table S4 Annotation of *Oecanthus sinensis* mitochondrial genomes

| Feature | Strand | Position | Initiation codon | Stop codon | Anticodon |
| --- | --- | --- | --- | --- | --- |
| *trnI* | J | 1-64(1) |  |  | GAT |
| *trnQ* | N | 66-134(2) |  |  | TTG |
| *trnM* | J | 137-205(0) |  |  | CAT |
| *nad2* | J | 206-1222(-2) | ATT | TAA |  |
| *trnW* | J | 1221-1286(-8) |  |  | TCA |
| *trnC* | N | 1279-1341(0) |  |  | GCA |
| *trnY* | N | 1342-1406(-8) |  |  | GTA |
| *cox1* | J | 1399-2940(5) | ATT | TAA |  |
| *trnL(UUR)* | J | 2946-3009(0) |  |  | TAA |
| *cox2* | J | 3010-3688(0) | ATA | T |  |
| *trnK* | J | 3689-3758(-1) |  |  | CTT |
| *trnD* | J | 3758-3823(0) |  |  | GTC |
| *atp8* | J | 3824-3985(-7) | ATT | TAA |  |
| *atp6* | J | 3979-4656(-1) | ATG | TAA |  |
| *cox3* | J | 4656-5442(0) | ATG | T |  |
| *trnG* | J | 5443-5506(0) |  |  | TCC |
| *nad3* | J | 5507-5858(0) | ATT | T |  |
| *trnA* | J | 5859-5922(15) |  |  | TGC |
| *trnR* | J | 5938-5998(-6) |  |  | TCG |
| *trnE* | N | 5993-6057(20) |  |  | TTC |
| *trnS(AGN)* | N | 6078-6142(0) |  |  | GCT |
| *trnN* | N | 6143-6207(1) |  |  | GTT |
| *trnF* | N | 6209-6271(-10) |  |  | GAA |
| *nad5* | N | 6262-7976(18) | ATT | TAG |  |
| *trnH* | N | 7995-8060(0) |  |  | GTG |
| *nad4* | N | 8061-9393(-7) | ATG | T |  |
| *nad4L* | N | 9387-9683(9) | ATG | TAA |  |
| *trnT* | J | 9693-9758(0) |  |  | TGT |
| *trnP* | N | 9759-9821(2) |  |  | TGG |
| *nad6* | J | 9824-10333(32) | ATG | TAA |  |
| *cob* | J | 10366-11502(3) | ATA | TAA |  |
| *trnS(UCN)* | J | 11506-11572(6) |  |  | TGA |
| *nad1* | N | 11579-12518(1) | ATG | T |  |
| *trnL(CUN)* | N | 12520-12582(0) |  |  | TAG |
| *rrnL* | N | 12583-13880(0) |  |  |  |
| *trnV* | N | 13881-13947(0) |  |  | TAC |
| *rrnS* | N | 13948-14694(0) |  |  |  |
| Control region | - | 14694-16142 |  |  |  |

Table S5 Annotation of *Truljalia hibinonis* mitochondrial genomes

| Feature | Strand | Position | Initiation codon | Stop codon | Anticodon |
| --- | --- | --- | --- | --- | --- |
| *trnI* | J | 1-62(-3) |  |  | GAT |
| *trnQ* | N | 60-127(-1) |  |  | TTG |
| *trnM* | J | 127-193(0) |  |  | CAT |
| *nad2* | J | 194-1189(-2) | ATT | TAA |  |
| *trnW* | J | 1188-1251(-8) |  |  | TCA |
| *trnC* | N | 1244-1305(0) |  |  | GCA |
| *trnY* | N | 1306-1369(-8) |  |  | GTA |
| *cox1* | J | 1362-2901(0) | ATT | T |  |
| *trnL(UUR)* | J | 2902-2965(0) |  |  | TAA |
| *cox2* | J | 2966-3643(0) | ATG | TAA |  |
| *trnK* | J | 3644-3711(-1) |  |  | CTT |
| *trnD* | J | 3711-3775(0) |  |  | GTC |
| *atp8* | J | 3776-3934(-7) | ATA | TAA |  |
| *atp6* | J | 3928-4608(-1) | ATT | TAA |  |
| *cox3* | J | 4608-5394(0) | ATG | T |  |
| *trnG* | J | 5395-5457(0) |  |  | TCC |
| *nad3* | J | 5458-5811(2) | ATT | TAA |  |
| *trnA* | J | 5814-5878(0) |  |  | TGC |
| *trnR* | J | 5879-5940(-6) |  |  | TCG |
| *trnE* | N | 5935-5998(2) |  |  | TTC |
| *trnS(AGN)* | N | 6001-6066(0) |  |  | GCT |
| *trnN* | N | 6067-6132(0) |  |  | GTT |
| *trnF* | N | 6133-6194(1) |  |  | GAA |
| *nad5* | N | 6196-7905(18) | ATT | TAA |  |
| *trnH* | N | 7924-7987(0) |  |  | GTG |
| *nad4* | N | 7988-9329(-7) | ATG | T |  |
| *nad4L* | N | 9323-9619(2) | ATG | TAA |  |
| *trnT* | J | 9622-9686(0) |  |  | TGT |
| *trnP* | N | 9687-9749(2) |  |  | TGG |
| *nad6* | J | 9752-10276(-1) | ATA | TAA |  |
| *cob* | J | 10276-11410(0) | ATG | TAA |  |
| *trnS(UCN)* | J | 11411-11472(-2) |  |  | TGA |
| *nad1* | N | 11471-12439(-6) | ATA | TAA |  |
| *trnL(CUN)* | N | 12434-12496(0) |  |  | TAG |
| *rrnL* | N | 12497-13765(0) |  |  |  |
| *trnV* | N | 13766-13833(0) |  |  | TAC |
| *rrnS* | N | 13834-14622(0) |  |  |  |
| Control region | - | 14622-15120 |  |  |  |

Table S6 Best partitioning scheme and model selected by PartitionFinder

| Subset | Subset Partitions | Best Model |
| --- | --- | --- |
| Partition 1 | COX1_1, COX2_1, CYTB_1, COX3_1, ATP8_1, ATP8_2, ND6_1, ND2_1, ND3_1, ATP6_1 | GTR+I+G |
| Partition 2 | COX3_2, CYTB_2, COX2_2, COX1_2, ND6_2, ATP6_2, ND3_2, ND2_2 | GTR+I+G |
| Partition 3 | COX1_3, CYTB_3, COX2_3, COX3_3, ATP6_3, ND2_3, ND3_3, ATP8_3, ND6_3 | TVM+I+G |
| Partition 4 | rrnS, rrnL, ND5_1, ND1_1, ND4_1, trnV, ND4L_1, trnC, trnH, trnM, trnA, trnT, trnQ, trnP, trnY, trnI, trnS1, trnG, trnR, trnK, trnS2, trnD, trnW, trnF, trnE, trnL2, trnL1, trnN | GTR+I+G |
| Partition 5 | ND4L_2, ND5_2, ND4_2, ND1_2 | GTR+I+G |
| Partition 6 | ND4L_3, ND1_3, ND4_3, ND5_3 | GTR+I+G |

Table S7 Fossil calibration constraints used in the divergence time estimate analysis

| Fossil names (Family) | Median age (min–max) Ma | Notes | Reference |
| --- | --- | --- | --- |
| *Conocephalus martyi* (Tettigoniidae) | 57.6 (56.0–59.2) | Oldest definitive Conocephalinae | Piton, 1940 |
| *Gryllus vociferans* (Gryllida) | 61 (56.0–66.0) | Oldest definitive Gryllinae | Cockerell, 1925 |
| *Aboilus tuzigouensis* (Prophalangopsidae) | 193.05 (189.6–196.5) | Oldest definitive Prophalangopsidae | Lin and Huang, 2006 |
| *Raphogla rubra* (Raphoglidae) | 255.7 (251–260.4) | Oldest definitive Ensifera | Bethoux et al., 2002; Song et al., 2015 |
| *Eolocustopsis primitive* (Eolocustopsidae) | 255.7 (251–260.4) | Oldest definitive Caelifera | Riek, 1976 |
| *Oedischia williamsoni* (Oedischiidae) | 301.3 (298.9–303.7) | Oldest definitive  Orthoptera | Brongniart, 1885 |

Table S8 Specimens use for ancestral character state reconstructions of Ensifera. Frequency structure (Fs) explanation are as follows: pure tone (pure), broadband noise (broadband), and broadband pure tone (intermediate).

| Taxon | Fd (KHz) | Fs | Reference |
| --- | --- | --- | --- |
| *Teleogryllus emma* | 4.8 | pure | BioAcoustica |
| *Velarifictorus hemelytrus* | 5 | pure | BioAcoustica |
| *Loxoblemmus doenitzi* | 5 | pure | BioAcoustica |
| *Loxoblemmus equestris* | 5 | pure | BioAcoustica |
| *Oecanthus rufescens* | 2.5 | pure | BioAcoustica |
| *Oecanthus sinensis* | 2.5 | pure | This study |
| *Truljalia hibinonis* | 4.6 | pure | This study |
| *Gryllotalpa orientalis* | 2.2 | pure | BioAcoustica |
| *Gryllotalpa pluvialis* | 2.2 | pure | BioAcoustica |
| *Gryllotalpa unispina* | 2.2 | pure | BioAcoustica |
| *Cyphoderris monstrosa* | 13 | pure | Morris, 2002 |
| *Lipotactes tripyrga* | 15 | broadband | BioAcoustica |
| *Hexacentrus japonicus* | 12 | broadband | BioAcoustica |
| *Hexacentrus unicolor* | 13 | broadband | BioAcoustica |
| *Conocephalus melaenus* | 15 | broadband | Chang, 2007 |
| *Conocephalus maculatus* | 20.5 | broadband | Chang, 2007 |
| *Pseudorhynchus acuminatus* | 12 | broadband | BioAcoustica |
| *Pseudorhynchus crassiceps* | 13 | broadband | BioAcoustica |
| *Ruspolia lineosa* | 14 | broadband | BioAcoustica |
| *Ruspolia sp.* | 16 | broadband | BioAcoustica |
| *Ruspolia dubia* | 14 | broadband | BioAcoustica |
| *Deracantha onos* | 14 | broadband | BioAcoustica |
| *Zichya barabovi* | 16 | broadband | BioAcoustica |
| *Atlanticus sp.* | 15 | broadband | BioAcoustica |
| *Anabrus simplex* | 13.6 | broadband | BioAcoustica |
| *Chizuella bonneti* | 26 | broadband | This study |
| *Sphagniana ussuriana* | 16 | broadband | This study |
| *Gampsocleis gratiosa* | 4.5 | intermediate | This study |
| *Uvarovites inflatus* | 5 | intermediate | This study |
| *Orophyllus montanus* | 6.8–7.8 | broadband | BioAcoustica |
| *Pseudophyllus titan* | 2.2 | pure | This study |
| *Phyllomimus sinicus* | 15 | broadband | BioAcoustica |
| *Phyllomimus detersus* | 14 | broadband | BioAcoustica |
| *Mecopoda elongata* | 8.4 | intermediate | BioAcoustica |
| *Mecopoda niponensis* | 6.8 | intermediate | BioAcoustica |
| *Ruidocollaris obscura* | 12 | broadband | BioAcoustica |
| *Sinochlora longifissa* | 11 | broadband | BioAcoustica |
| *Holochlora fruhstorferi* | 13 | broadband | BioAcoustica |
| *Ducetia sp.* | 12 | broadband | BioAcoustica |
| *Elimaea cheni* | 7.5 | broadband | BioAcoustica |
| *Kuwayamaea chinensis* | 10 | broadband | BioAcoustica |

Table S9 Specimens use for ancestral character state reconstructions of Tettigoniidea, with GenBank accession numbers. Sound datas obtained from BioAcoustica or recorded in this study, frequency structure (Fs) explanation are as follows: pure tone (pure), broadband noise (broadband), and broadband pure tone (intermediate).

| Taxon | Fd (KHz) | Fs | 18S | 28S | H3 | WG | COII |
| --- | --- | --- | --- | --- | --- | --- | --- |
| *Mecopoda sp.* | 8.4 | intermediate | JF792575 | ND | ND | ND | JQ917910 |
| *Acrometopa servillea* | 11 | broadband | KF570717 | KF570853 | KF571082 | KF571217 | KF570962 |
| *Horatosphaga sp.* | 11.6 | broadband | KF570733 | KF570954 | KF571161 | KF571294 | KF571033 |
| *Amblycorypha sp.* | 10-14 | broadband | KF570727 | KF570842 | KF571154 | KF571288 | KX429859 |
| *Ancistrura nigrovittata* | 14 | broadband | AM887177 | AM887333 | AM886869 | ND | ND |
| *Barbitistes ocskayi* | 10.6 | broadband | ND | ND | KX429904 | KX429957 |  |
| *Leptophyes sp.* | 30 | broadband | KF570751 | KF570851 | KF571083 | KF571218 | KF570963 |
| *Metaplastes ornatus* | 17 | broadband | AM887285 | AM887441 | AM886977 | ND | ND |
| *Poecilimon ornatus* | 13 | broadband | KF570752 | KF570852 | KF571086 | KF571221 | KF570966 |
| *Polysarcus denticauda* | 12 | broadband | KX429779 | KX429825 | KX429918 | KX429970 | ND |
| *Ducetia japonica* | 11 | broadband | KF570746 | KF570862 | KX429906 | KF571333 | KF571063 |
| *Elimaea sp.* | 12 | broadband | KX429768 | KX429813 | KX429907 | KX429961 | KX429865 |
| *Hemielimaea sp.* | 15 | broadband | KX429771 | KX429817 | KX429912 | KX429964 | KX429868 |
| *Holochlora sp.* | 11 | broadband | KF570724 | KF570860 | KF571167 | KF571301 | ND |
| *Insara elegans* | 15 | broadband | KX429773 | KX429819 | ND | KX429966 | ND |
| *Letana sp.* | 9.7 | broadband | KF570748 | KF570848 | KF571203 | KF571339 | KF571067 |
| *Microcentrum rhombifolium* | 9 | broadband | KX429774 | KF570836 | KF571080 | KF571215 | KF570960 |
| *Syntechna sp.* | 11 | broadband | KF570721 | KF570835 | KF571176 | KF571310 | KF571041 |
| *Odontura stenoxypha* | 23 | broadband | KM819645 | ND | KM982143 | ND | ND |
| *Phaneroptera falcata* | 25 | broadband | KF570718 | KF570864 | KF571088 | KF571223 | ND |
| *Montezumina modesta* | 10-14 | broadband | KX429775 | KX429820 | KX429914 | ND | KX429869 |
| *Scudderia furcata* | 11 | broadband | KF570753 | KF570837 | KF571131 | KF571265 | KF571007 |
| *Stilpnochlora sp.* | 8 | broadband | KF570731 | KX429828 | KF571149 | KF571283 | KF571023 |
| *Tylopsis sp.* | 17 | broadband | KF570738 | KF570869 | KF571163 | KF571297 | KX429873 |
| *Ischnomela sp.* | 13 | broadband | KF570776 | KF570914 | KF571170 | KF571304 | ND |
| *Balboana tibialis* | 8.4 | broadband | KF570712 | KF570827 | KF571117 | KF571252 | KF570827 |
| *Championica sp.* | 16.3 | broadband | KF570705 | KF570831 | KF571171 | KF571305 | KF571036 |
| *Pterophylla camellifolia* | 5 | broadband | KF570715 | KF570833 | KF571210 | KF571347 | ND |
| *Teleutias sp.* | 20 | broadband | KF570815 | KF570829 | KF571119 | KF571254 | KF570996 |
| *Phyllozelus sp.* | 12 | pure | KF570781 | KF570888 | KF571197 | KF571332 | KF571062 |
| *Pseudophyllus titan* | 2.2 | pure | MG752987 | MG752988 | ND | ND | KY783906 |
| *Deracantha sp.* | 13 | broadband | ND | ND | KX429887 | KX429937 | ND |
| *Macroxiphus sumatranus* | 11.5 | broadband | KF570803 | KF570930 | KF571110 | KF571245 | KF570988 |
| *Sphyrometopa sp.* | 12 | broadband | KF570807 | KF570920 | KF571166 | KF571300 | KX429854 |
| *Conocephalus sp.* | 20.5 | broadband | KF570785 | KF570933 | KF571207 | KF571343 | KF571071 |
| *Orchelimum sp.* | 12 | broadband | KF570784 | KF570938 | KF571079 | KF571214 | KF570959 |
| *Belocephalus subapterus* | 9 | broadband | KF570797 | KF570927 | KF571153 | KF571287 | KF571027 |
| *Copiphora rhinoceros* | 9.4 | broadband | KF570790 | KF570918 | KF571099 | KF571234 | KF570977 |
| *Lirometopum coronatum* | 12 | broadband | KF570800 | KF570919 | KF571143 | KF571277 | KF571017 |
| *Neoconocephalus triops* | 10-12 | broadband | KF570796 | KF570950 | KF571152 | KF571286 | KF571026 |
| *Pseudorhynchus sp.* | 10.4 | broadband | KF570795 | KF570922 | KF571208 | KX429942 | KF571072 |
| *Ruspolia sp.* | 15.2 | broadband | KF570804 | KF570924 | KF571135 | KF571269 | KX429852 |
| *Acanthoplus sp.* | 15 | broadband | KF570692 | KF570873 | KF571101 | KF571236 | KF570979 |
| *Aerotegmina kilimandjarica* | 5 | broadband | KF570687 | KF570904 | KF571129 | KF571263 | KF571005 |
| *Hexacentrus sp.* | 12 | broadband | KF570685 | ND | KF571111 | KF571246 | KF570989 |
| *Lipotactes sp.* | 12 | broadband | KF570698 | KF570876 | KF571189 | KF571323 | KF571053 |
| *Mortoniellus sp.* | 16 | broadband | KF570697 | KF570875 | KF571188 | KF571322 | KF571052 |
| *Requena sp.* | 12 | broadband | KF570696 | KF570901 | KF571133 | KF571267 | KF571008 |
| *Neobarrettia victoriae* | 12 | broadband | KU550809 | KU550770 | KU550919 | KU550849 | KU550884 |
| *Meconema thalassinum* | 0.4 | pure | KX429761 | KX429805 | KX429897 | KX429950 | ND |
| *Phlugis sp.* | 40 | broadband | KF570754 | KF570898 | KF571140 | KF571274 | KF571014 |
| *Typophyllum sp.* | 8 | pure | KF570693 | KF570946 | KF571103 | KF571238 | KF570981 |
| *Decticus verrucivorus* | 11 | broadband | KX429789 | KX429839 | KX429929 | ND | ND |
| *Atlanticus gibbosus* | 15 | broadband | KU550812 | KU550773 | KU550922 | KU550852 | KU550887 |
| *Gampsocleis gratiosa* | 4.5 | intermediate | JF792560 | ND | ND | ND | EU527333 |
| *Uvarovites inflatus* | 5 | intermediate | ND | ND | ND | ND | KP098593 |
| *Eupholidoptera chabrieri* | 15 | broadband | KX429790 | KX429840 | KX429930 | KX429982 | KX429880 |
| *Parapholidoptera distincta* | 25 | broadband | ND | EU120873 | ND | ND | ND |
| *Pholidoptera griseoaptera* | 11 | broadband | KF570767 | KF570893 | KF571089 | KF571224 | KF570967 |
| *Pholidoptera littoralis* | 7 | broadband | KX429792 | KX429842 | KX429933 | KX429985 | KX429883 |
| *Plagiostira albonotata* | 15 | broadband | KF570768 | KF570894 | KF571151 | KF571285 | KF571025 |
| *Montana barretii* | 25 | broadband | ND | EU120874 | ND | ND | ND |
| *Parnassiana tenuis* | 14 | broadband | ND | EU120832 | ND | ND | ND |
| *Platycleis affinis* | 16 | broadband | KF570764 | KF570891 | KF571085 | KF571220 | KF570965 |
| *Sepiana sepium* | 15 | broadband | KX429794 | KX429844 | KX429935 | KX429987 | KX429885 |
| *Tessellana sp.* | 30 | broadband | KU550829 | KU550789 | KU550939 | KU550869 | KU550902 |
| *Bicolorana kraussi* | 16 | broadband | KX429788 | KX429837 | KX429928 | KX429981 | KX429879 |
| *Metrioptera brachyptera* | 15 | broadband | KX429796 | ND | KX429931 | KX429983 | KX429881 |
| *Sphagniana ussuriana* | 12-20 | broadband | MG752989 | MG752990 | MG752991 | ND | ND |
| *Anabrus simplex* | 13.4 | broadband | KF570763 | KF570890 | KF571081 | KF571216 | KF570961 |
| *Eremopedes bilineatus* | 16 | broadband | KU550844 | KU550801 | KU550943 | KU550881 | KU550913 |
| *Pachytrachis gracilis* | 10.4 | broadband | KF570769 | KF570892 | KF571090 | KF571225 | KF570968 |
| *Pediodectes stevensonii* | 13-15 | broadband | KU550816 | KU550776 | KU550926 | KU550856 | KU550889 |
| *Capnobotes fuliginosus* | 8-9 | broadband | KU550824 | KU550784 | KU550934 | KU550864 | KU550897 |
| *Capnobotes occidentalis* | 12.3 | broadband | KU550817 | KU550777 | KU550927 | KU550857 | KU550890 |
| *Tettigonia cantans* | 7.9-10 | broadband | KF570765 | ND | KF571087 | KF571222 | ND |
| *Tettigonia viridissima* | 10.6 | broadband | KX429795 | KX429846 | KX429936 | KX429988 | KX429886 |
| *Bolua turkiyae* | 20-40 | broadband | ND | EU120854 | ND | ND | ND |
| *Tympanophora* | 7.4-8.1 | broadband | KF570777 | KF570947 | KF571126 | KF571260 | KF571002 |

Table S10 Codon number and RSCU in *P. titan* mitochondrial PCGs

| Codon | Count | RSCU | Codon | Count | RSCU | Codon | Count | RSCU | Codon | Count | RSCU |
| --- | --- | --- | --- | --- | --- | --- | --- | --- | --- | --- | --- |
| UUU(F) | **245** | 1.6 | UCU(S) | 73 | 1.87 | UAU(Y) | 126 | 1.58 | UGU(C) | 38 | 1.9 |
| UUC(F) | 62 | 0.4 | UCC(S) | 31 | 0.79 | UAC(Y) | 33 | 0.42 | UGC(C) | 2 | 0.1 |
| UUA(L) | **357** | 3.56 | UCA(S) | 84 | 2.15 | UAA(*) | 0 | 0 | UGA(W) | 96 | 1.64 |
| UUG(L) | 77 | 0.77 | UCG(S) | 4 | 0.1 | UAG(*) | 0 | 0 | UGG(W) | 21 | 0.36 |
| CUU(L) | 74 | 0.74 | CCU(P) | 71 | 1.99 | CAU(H) | 59 | 1.51 | CGU(R) | 23 | 1.53 |
| CUC(L) | 15 | 0.15 | CCC(P) | 19 | 0.53 | CAC(H) | 19 | 0.49 | CGC(R) | 8 | 0.53 |
| CUA(L) | 75 | 0.75 | CCA(P) | 45 | 1.26 | CAA(Q) | 72 | 1.87 | CGA(R) | 25 | 1.67 |
| CUG(L) | 3 | 0.03 | CCG(P) | 8 | 0.22 | CAG(Q) | 5 | 0.13 | CGG(R) | 4 | 0.27 |
| AUU(I) | **308** | 1.66 | ACU(T) | 90 | 1.71 | AAU(N) | 133 | 1.66 | AGU(S) | 41 | 1.05 |
| AUC(I) | 64 | 0.34 | ACC(T) | 36 | 0.69 | AAC(N) | 27 | 0.34 | AGC(S) | 4 | 0.1 |
| AUA(M) | **209** | 1.68 | ACA(T) | 79 | 1.5 | AAA(K) | 67 | 1.6 | AGA(S) | 70 | 1.79 |
| AUG(M) | 40 | 0.32 | ACG(T) | 5 | 0.1 | AAG(K) | 17 | 0.4 | AGG(S) | 5 | 0.13 |
| GUU(V) | 75 | 1.55 | GCU(A) | 70 | 1.61 | GAU(D) | 52 | 1.46 | GGU(G) | 83 | 1.36 |
| GUC(V) | 5 | 0.1 | GCC(A) | 36 | 0.83 | GAC(D) | 19 | 0.54 | GGC(G) | 4 | 0.07 |
| GUA(V) | 93 | 1.93 | GCA(A) | 59 | 1.36 | GAA(E) | 65 | 1.57 | GGA(G) | 118 | 1.93 |
| GUG(V) | 20 | 0.41 | GCG(A) | 9 | 0.21 | GAG(E) | 18 | 0.43 | GGG(G) | 40 | 0.65 |

Table S11 Codon number and RSCU in *S. ussuriana* mitochondrial PCGs

| Codon | Count | RSCU | Codon | Count | RSCU | Codon | Count | RSCU | Codon | Count | RSCU |
| --- | --- | --- | --- | --- | --- | --- | --- | --- | --- | --- | --- |
| UUU(F) | **227** | 1.46 | UCU(S) | 86 | 2.12 | UAU(Y) | 130 | 1.57 | UGU(C) | 37 | 1.85 |
| UUC(F) | 85 | 0.54 | UCC(S) | 30 | 0.74 | UAC(Y) | 36 | 0.43 | UGC(C) | 3 | 0.15 |
| UUA(L) | **294** | 2.95 | UCA(S) | 79 | 1.94 | UAA(*) | 0 | 0 | UGA(W) | 90 | 1.68 |
| UUG(L) | 88 | 0.88 | UCG(S) | 6 | 0.15 | UAG(*) | 0 | 0 | UGG(W) | 17 | 0.32 |
| CUU(L) | 89 | 0.89 | CCU(P) | 83 | 2.18 | CAU(H) | 47 | 1.13 | CGU(R) | 14 | 1 |
| CUC(L) | 41 | 0.41 | CCC(P) | 24 | 0.63 | CAC(H) | 36 | 0.87 | CGC(R) | 2 | 0.14 |
| CUA(L) | 79 | 0.79 | CCA(P) | 39 | 1.03 | CAA(Q) | 67 | 1.7 | CGA(R) | 35 | 2.5 |
| CUG(L) | 7 | 0.07 | CCG(P) | 6 | 0.16 | CAG(Q) | 12 | 0.3 | CGG(R) | 5 | 0.36 |
| AUU(I) | **252** | 1.59 | ACU(T) | 93 | 1.64 | AAU(N) | 115 | 1.52 | AGU(S) | 56 | 1.38 |
| AUC(I) | 65 | 0.41 | ACC(T) | 39 | 0.69 | AAC(N) | 36 | 0.48 | AGC(S) | 11 | 0.27 |
| AUA(M) | **184** | 1.61 | ACA(T) | 86 | 1.52 | AAA(K) | 46 | 1.19 | AGA(S) | 54 | 1.33 |
| AUG(M) | 44 | 0.39 | ACG(T) | 9 | 0.16 | AAG(K) | 31 | 0.81 | AGG(S) | 3 | 0.07 |
| GUU(V) | 99 | 1.69 | GCU(A) | 95 | 1.9 | GAU(D) | 60 | 1.56 | GGU(G) | 73 | 1.3 |
| GUC(V) | 14 | 0.24 | GCC(A) | 42 | 0.84 | GAC(D) | 17 | 0.44 | GGC(G) | 6 | 0.11 |
| GUA(V) | 100 | 1.7 | GCA(A) | 58 | 1.16 | GAA(E) | 69 | 1.7 | GGA(G) | 97 | 1.72 |
| GUG(V) | 22 | 0.37 | GCG(A) | 5 | 0.1 | GAG(E) | 12 | 0.3 | GGG(G) | 49 | 0.87 |

Table S12 Codon number and RSCU in *O. sinensis* mitochondrial PCGs

| Codon | Count | RSCU | Codon | Count | RSCU | Codon | Count | RSCU | Codon | Count | RSCU |
| --- | --- | --- | --- | --- | --- | --- | --- | --- | --- | --- | --- |
| UUU(F) | **272** | 1.76 | UCU(S) | 95 | 2.22 | UAU(Y) | 176 | 1.87 | UGU(C) | 41 | 1.78 |
| UUC(F) | 37 | 0.24 | UCC(S) | 14 | 0.33 | UAC(Y) | 12 | 0.13 | UGC(C) | 5 | 0.22 |
| UUA(L) | **465** | 4.88 | UCA(S) | 114 | 2.67 | UAA(*) | 0 | 0 | UGA(W) | 91 | 1.9 |
| UUG(L) | 35 | 0.37 | UCG(S) | 5 | 0.12 | UAG(*) | 0 | 0 | UGG(W) | 5 | 0.1 |
| CUU(L) | 34 | 0.36 | CCU(P) | 69 | 2.04 | CAU(H) | 65 | 1.71 | CGU(R) | 17 | 1.19 |
| CUC(L) | 4 | 0.04 | CCC(P) | 15 | 0.44 | CAC(H) | 11 | 0.29 | CGC(R) | 0 | 0 |
| CUA(L) | 32 | 0.34 | CCA(P) | 51 | 1.51 | CAA(Q) | 65 | 1.78 | CGA(R) | 35 | 2.46 |
| CUG(L) | 2 | 0.02 | CCG(P) | 0 | 0 | CAG(Q) | 8 | 0.22 | CGG(R) | 5 | 0.35 |
| AUU(I) | **367** | 1.84 | ACU(T) | 66 | 1.62 | AAU(N) | 178 | 1.85 | AGU(S) | 30 | 0.7 |
| AUC(I) | 31 | 0.16 | ACC(T) | 17 | 0.42 | AAC(N) | 14 | 0.15 | AGC(S) | 1 | 0.02 |
| AUA(M) | **283** | 1.83 | ACA(T) | 75 | 1.84 | AAA(K) | 74 | 1.54 | AGA(S) | 82 | 1.92 |
| AUG(M) | 27 | 0.17 | ACG(T) | 5 | 0.12 | AAG(K) | 22 | 0.46 | AGG(S) | 1 | 0.02 |
| GUU(V) | 64 | 1.61 | GCU(A) | 68 | 2.01 | GAU(D) | 66 | 1.89 | GGU(G) | 74 | 1.41 |
| GUC(V) | 2 | 0.05 | GCC(A) | 12 | 0.36 | GAC(D) | 4 | 0.11 | GGC(G) | 1 | 0.02 |
| GUA(V) | 85 | 2.14 | GCA(A) | 53 | 1.57 | GAA(E) | 62 | 1.72 | GGA(G) | 125 | 2.38 |
| GUG(V) | 8 | 0.2 | GCG(A) | 2 | 0.06 | GAG(E) | 10 | 0.28 | GGG(G) | 10 | 0.19 |

Table S13 Codon number and RSCU in *T. hibinonis* mitochondrial PCGs

| Codon | Count | RSCU | Codon | Count | RSCU | Codon | Count | RSCU | Codon | Count | RSCU |
| --- | --- | --- | --- | --- | --- | --- | --- | --- | --- | --- | --- |
| UUU(F) | **216** | 1.56 | UCU(S) | 90 | 2.19 | UAU(Y) | 161 | 1.72 | UGU(C) | 49 | 1.92 |
| UUC(F) | 61 | 0.44 | UCC(S) | 39 | 0.95 | UAC(Y) | 26 | 0.28 | UGC(C) | 2 | 0.08 |
| UUA(L) | **419** | 4.37 | UCA(S) | 91 | 2.21 | UAA(*) | 0 | 0 | UGA(W) | 93 | 1.9 |
| UUG(L) | 56 | 0.58 | UCG(S) | 5 | 0.12 | UAG(*) | 0 | 0 | UGG(W) | 5 | 0.1 |
| CUU(L) | 40 | 0.42 | CCU(P) | 70 | 2.09 | CAU(H) | 60 | 1.56 | CGU(R) | 19 | 1.27 |
| CUC(L) | 7 | 0.07 | CCC(P) | 18 | 0.54 | CAC(H) | 17 | 0.44 | CGC(R) | 2 | 0.13 |
| CUA(L) | 49 | 0.51 | CCA(P) | 45 | 1.34 | CAA(Q) | 61 | 1.74 | CGA(R) | 39 | 2.6 |
| CUG(L) | 4 | 0.04 | CCG(P) | 1 | 0.03 | CAG(Q) | 9 | 0.26 | CGG(R) | 0 | 0 |
| AUU(I) | **360** | 1.74 | ACU(T) | 74 | 1.45 | AAU(N) | 189 | 1.84 | AGU(S) | 37 | 0.9 |
| AUC(I) | 53 | 0.26 | ACC(T) | 29 | 0.57 | AAC(N) | 16 | 0.16 | AGC(S) | 5 | 0.12 |
| AUA(M) | **264** | 1.82 | ACA(T) | 96 | 1.88 | AAA(K) | 64 | 1.6 | AGA(S) | 58 | 1.41 |
| AUG(M) | 26 | 0.18 | ACG(T) | 5 | 0.1 | AAG(K) | 16 | 0.4 | AGG(S) | 4 | 0.1 |
| GUU(V) | 62 | 1.66 | GCU(A) | 53 | 1.51 | GAU(D) | 57 | 1.7 | GGU(G) | 81 | 1.43 |
| GUC(V) | 8 | 0.21 | GCC(A) | 22 | 0.63 | GAC(D) | 10 | 0.3 | GGC(G) | 6 | 0.11 |
| GUA(V) | 71 | 1.91 | GCA(A) | 59 | 1.69 | GAA(E) | 62 | 1.75 | GGA(G) | 123 | 2.18 |
| GUG(V) | 8 | 0.21 | GCG(A) | 6 | 0.17 | GAG(E) | 9 | 0.25 | GGG(G) | 16 | 0.28 |


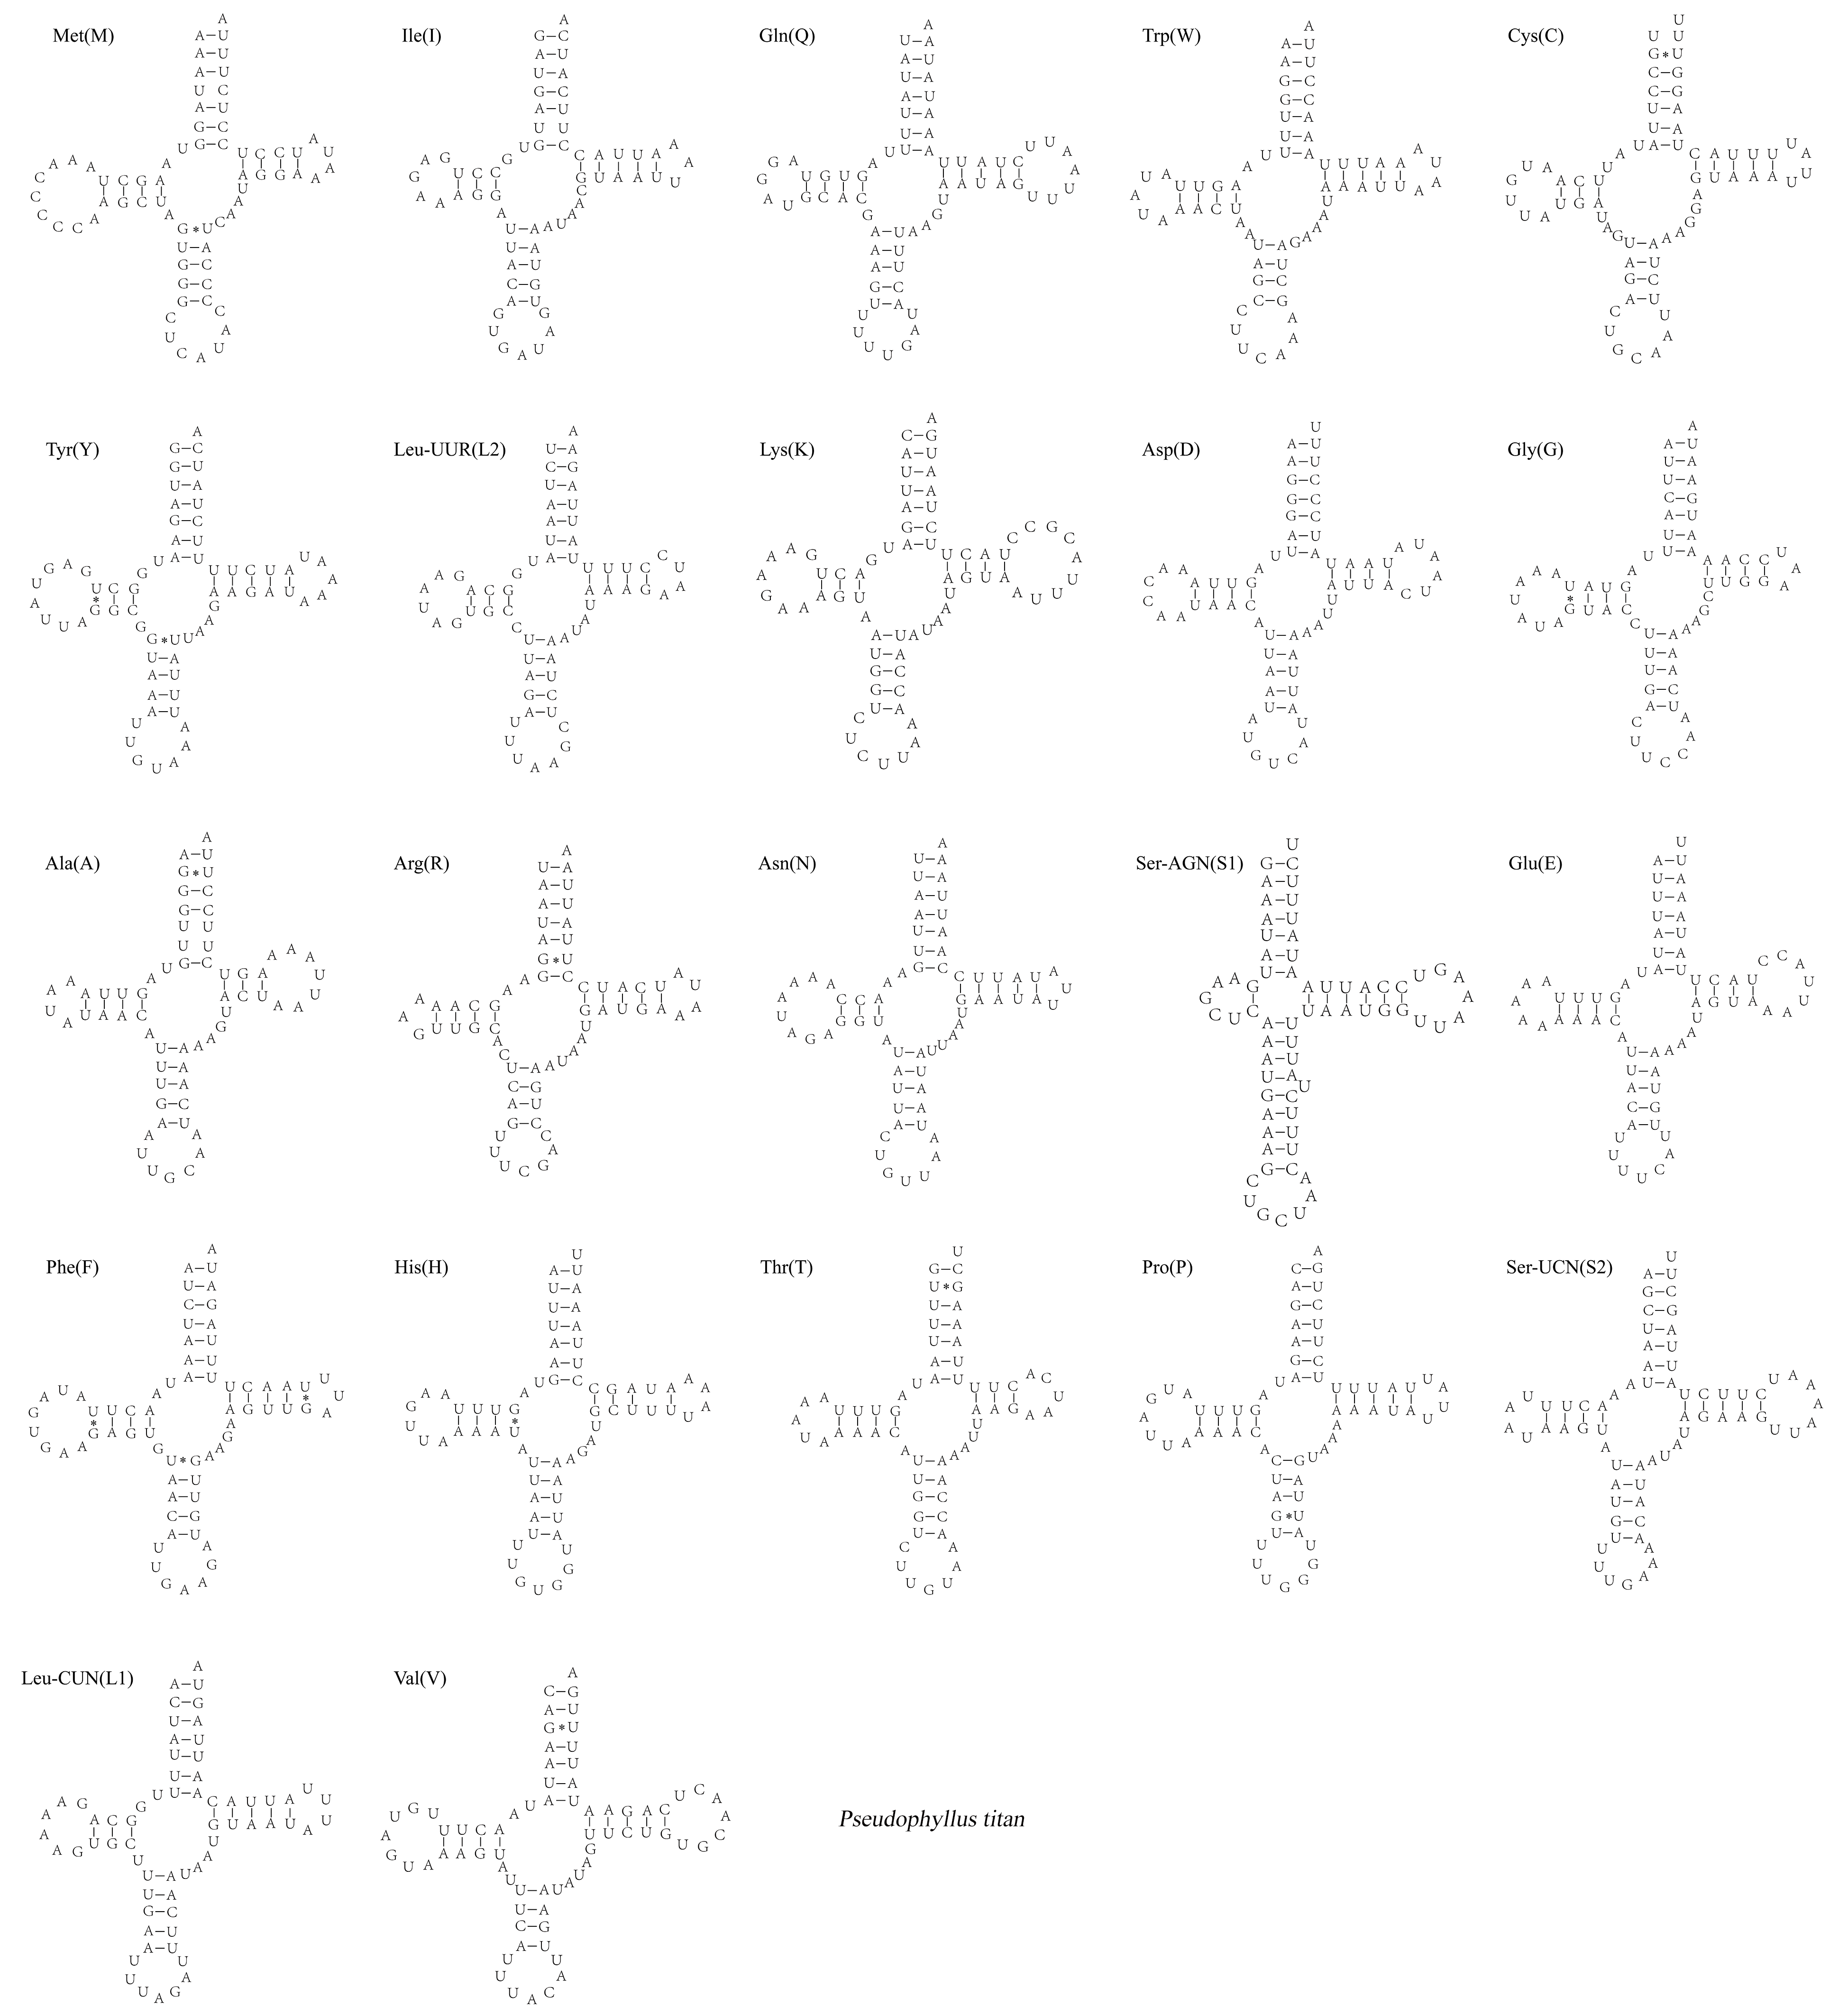


Figure S1. Inferred secondary structure for the tRNA of *P. titan*.


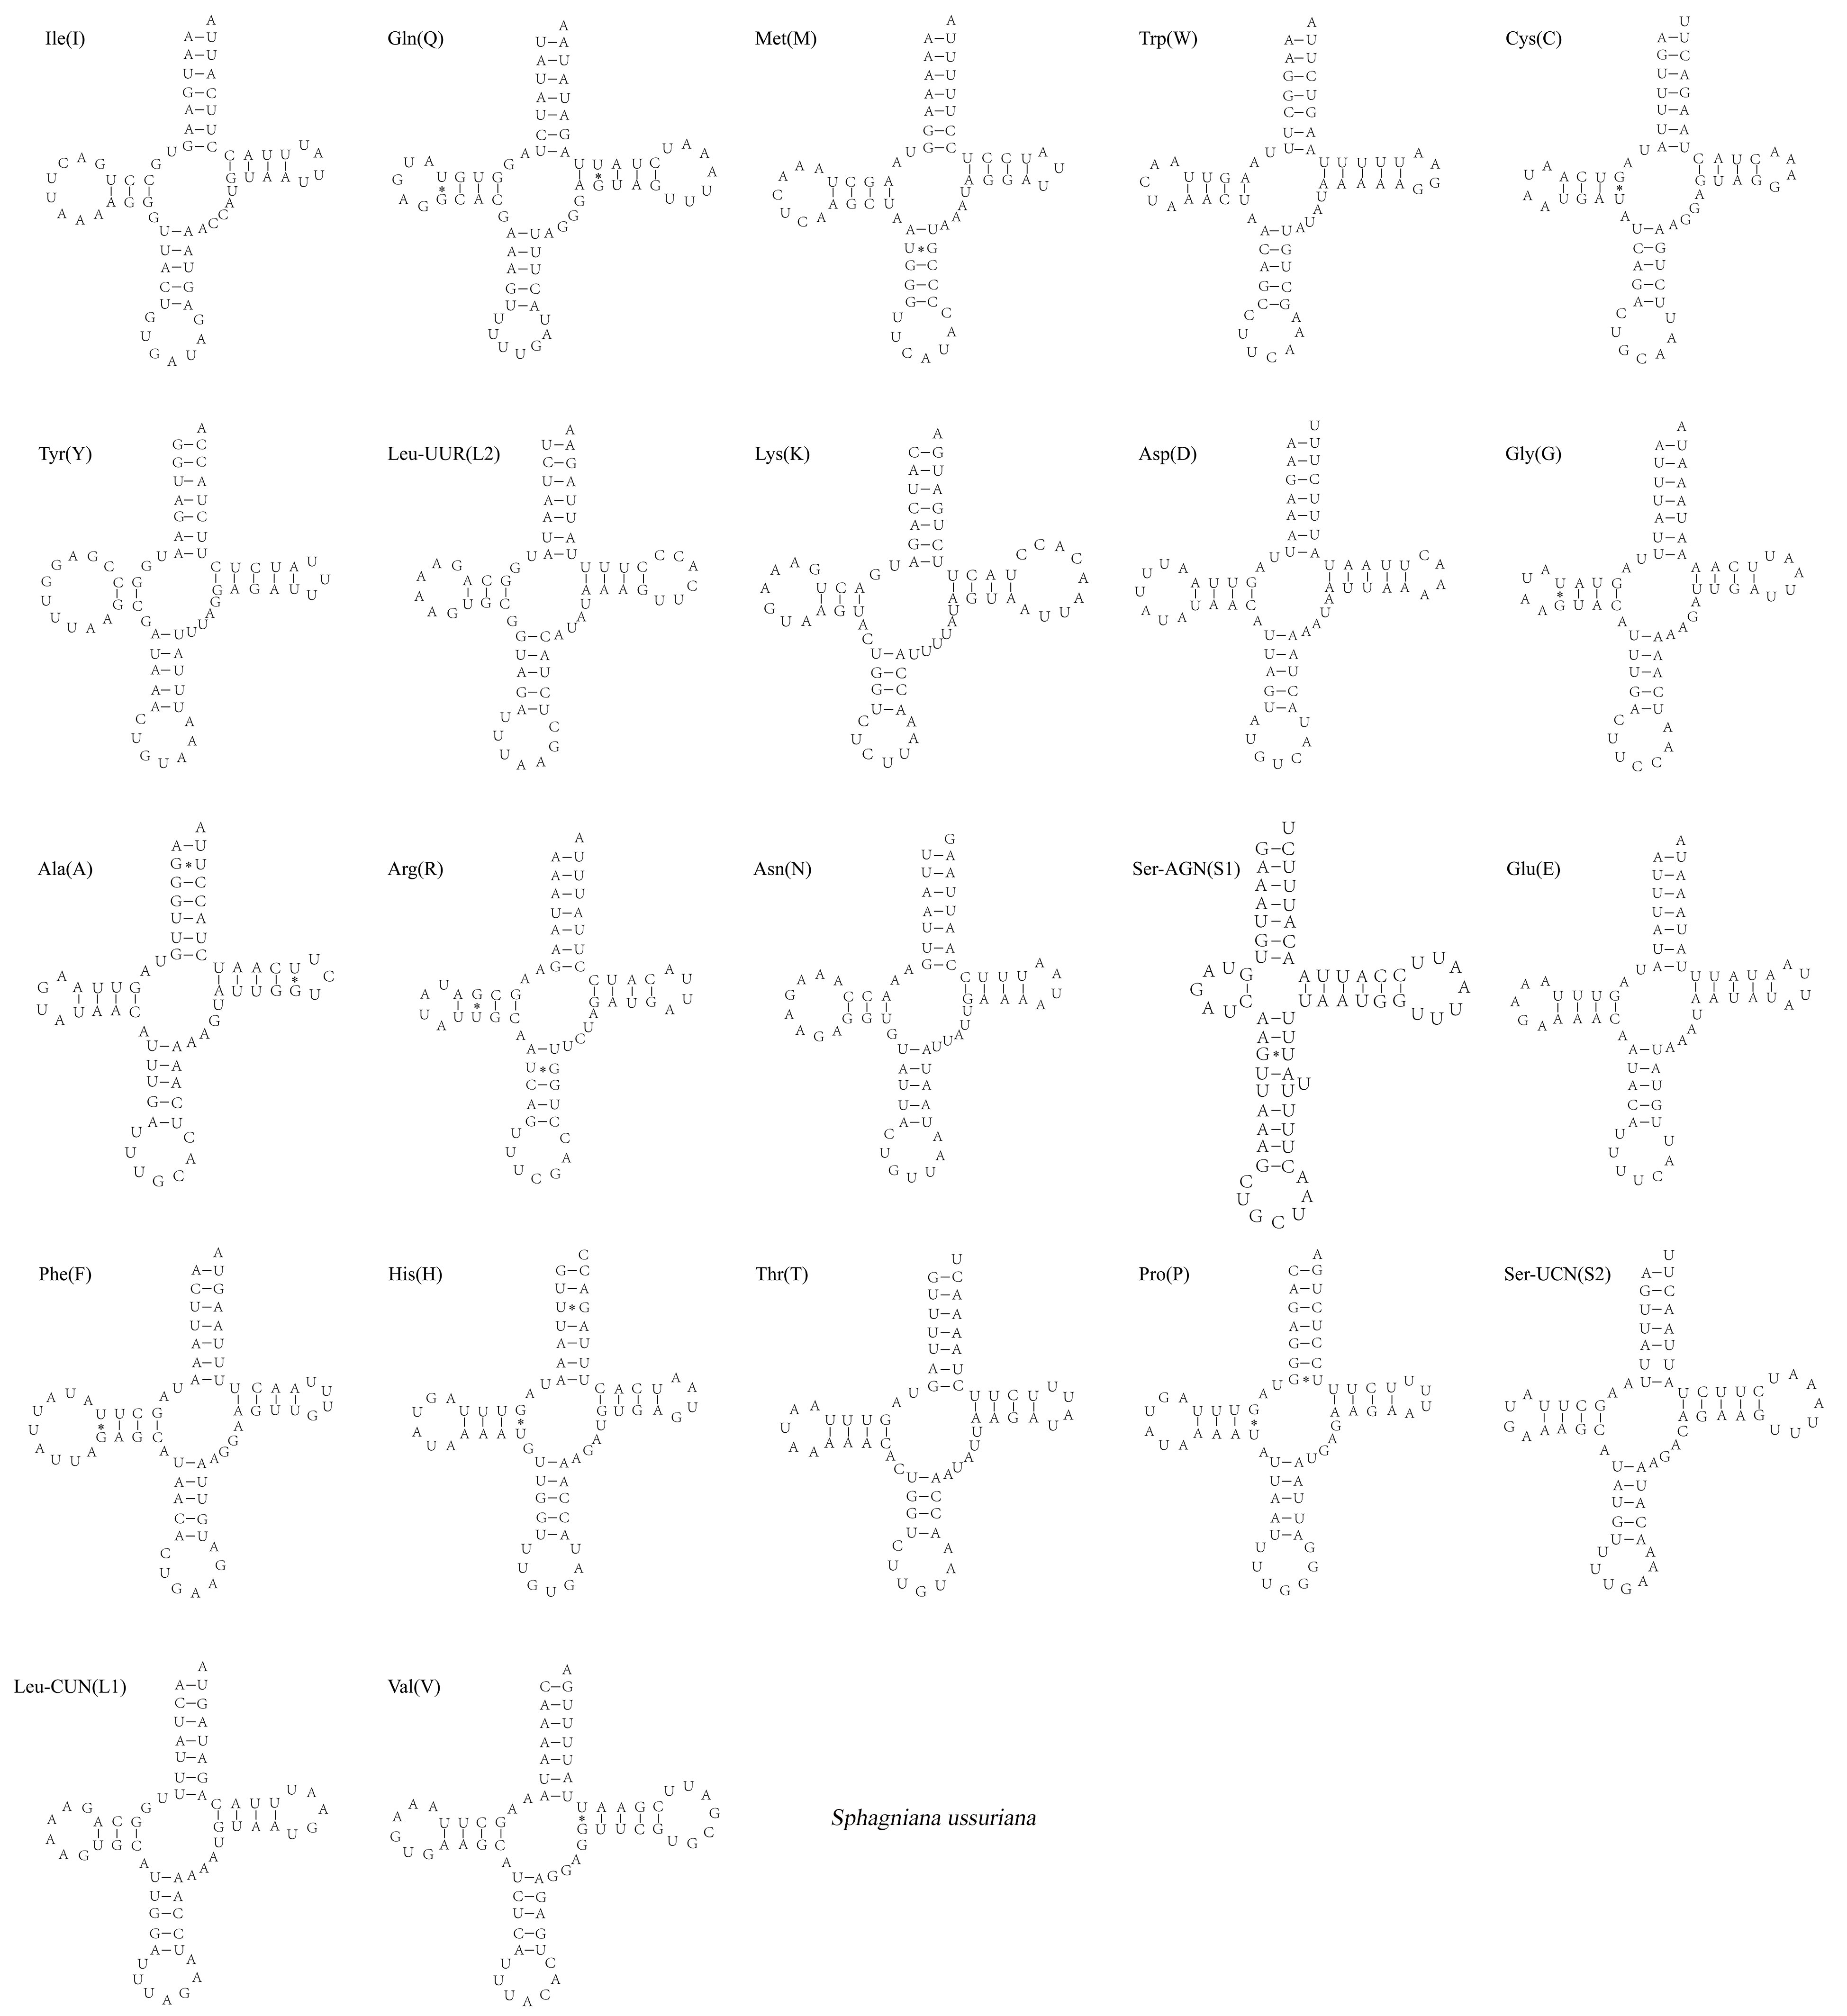


Figure S2. Inferred secondary structure for the tRNA of *S. ussuriana*.


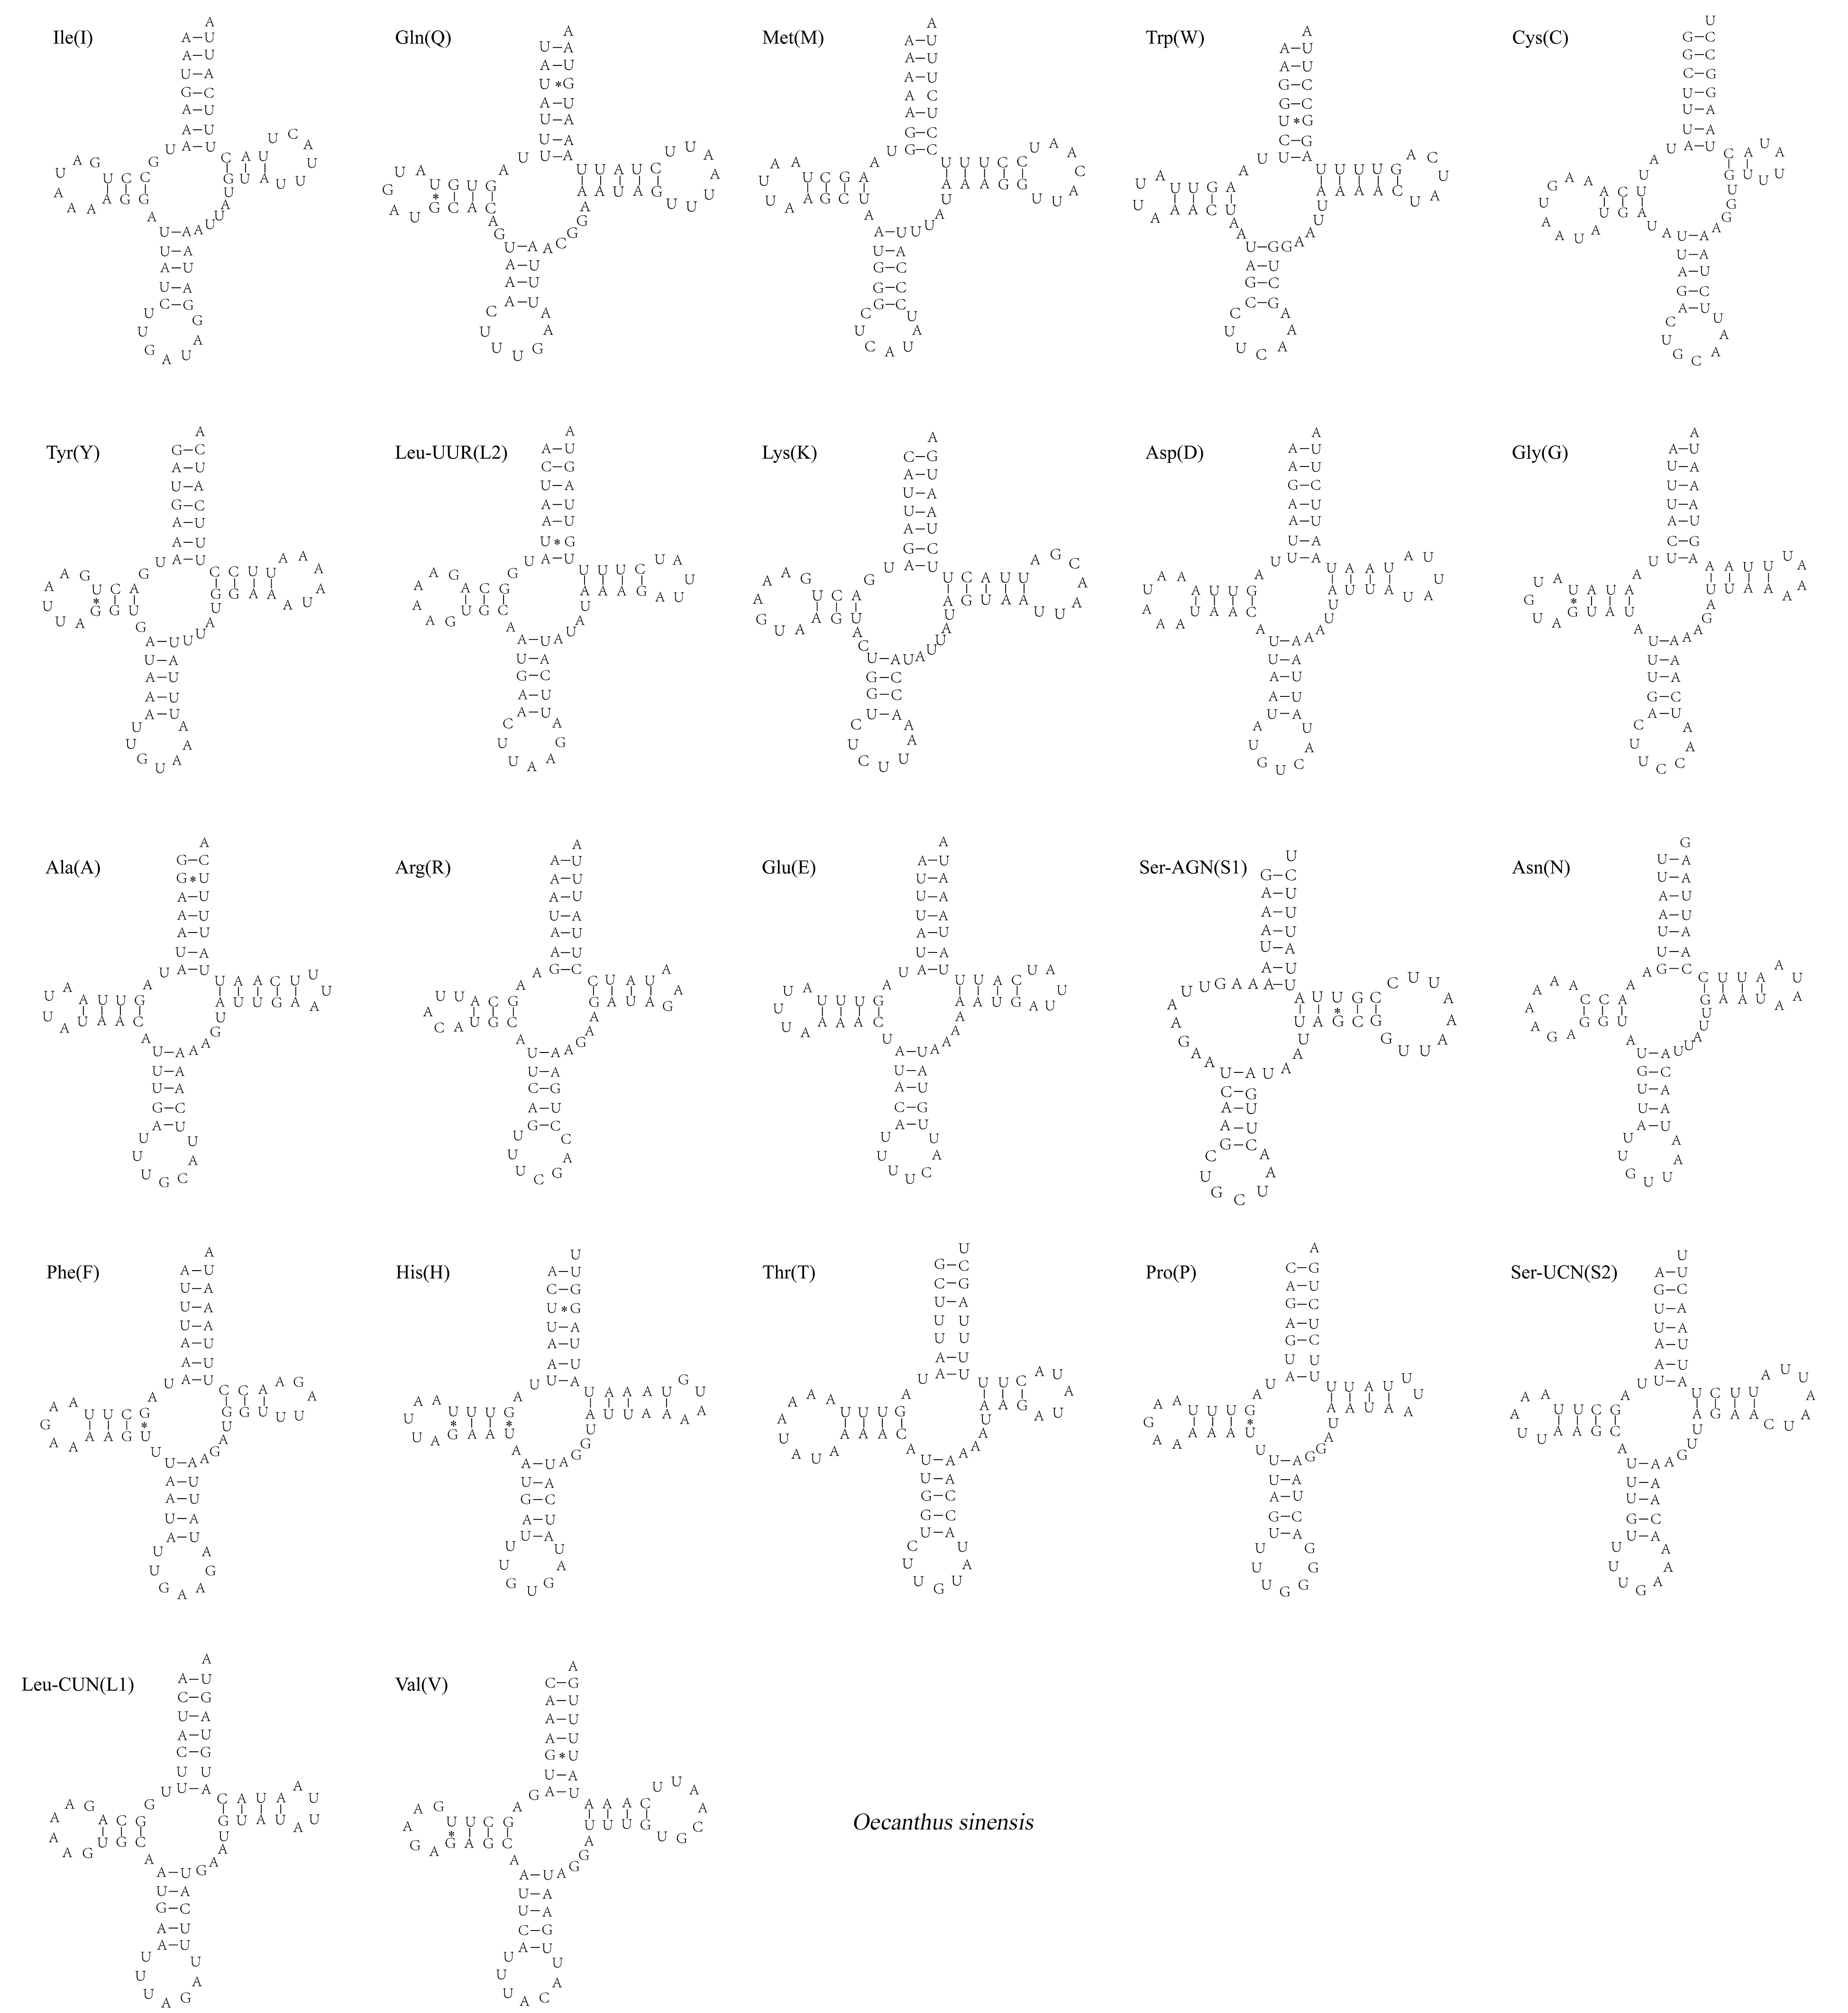


Figure S2. Inferred secondary structure for the tRNA of *S. ussuriana*.


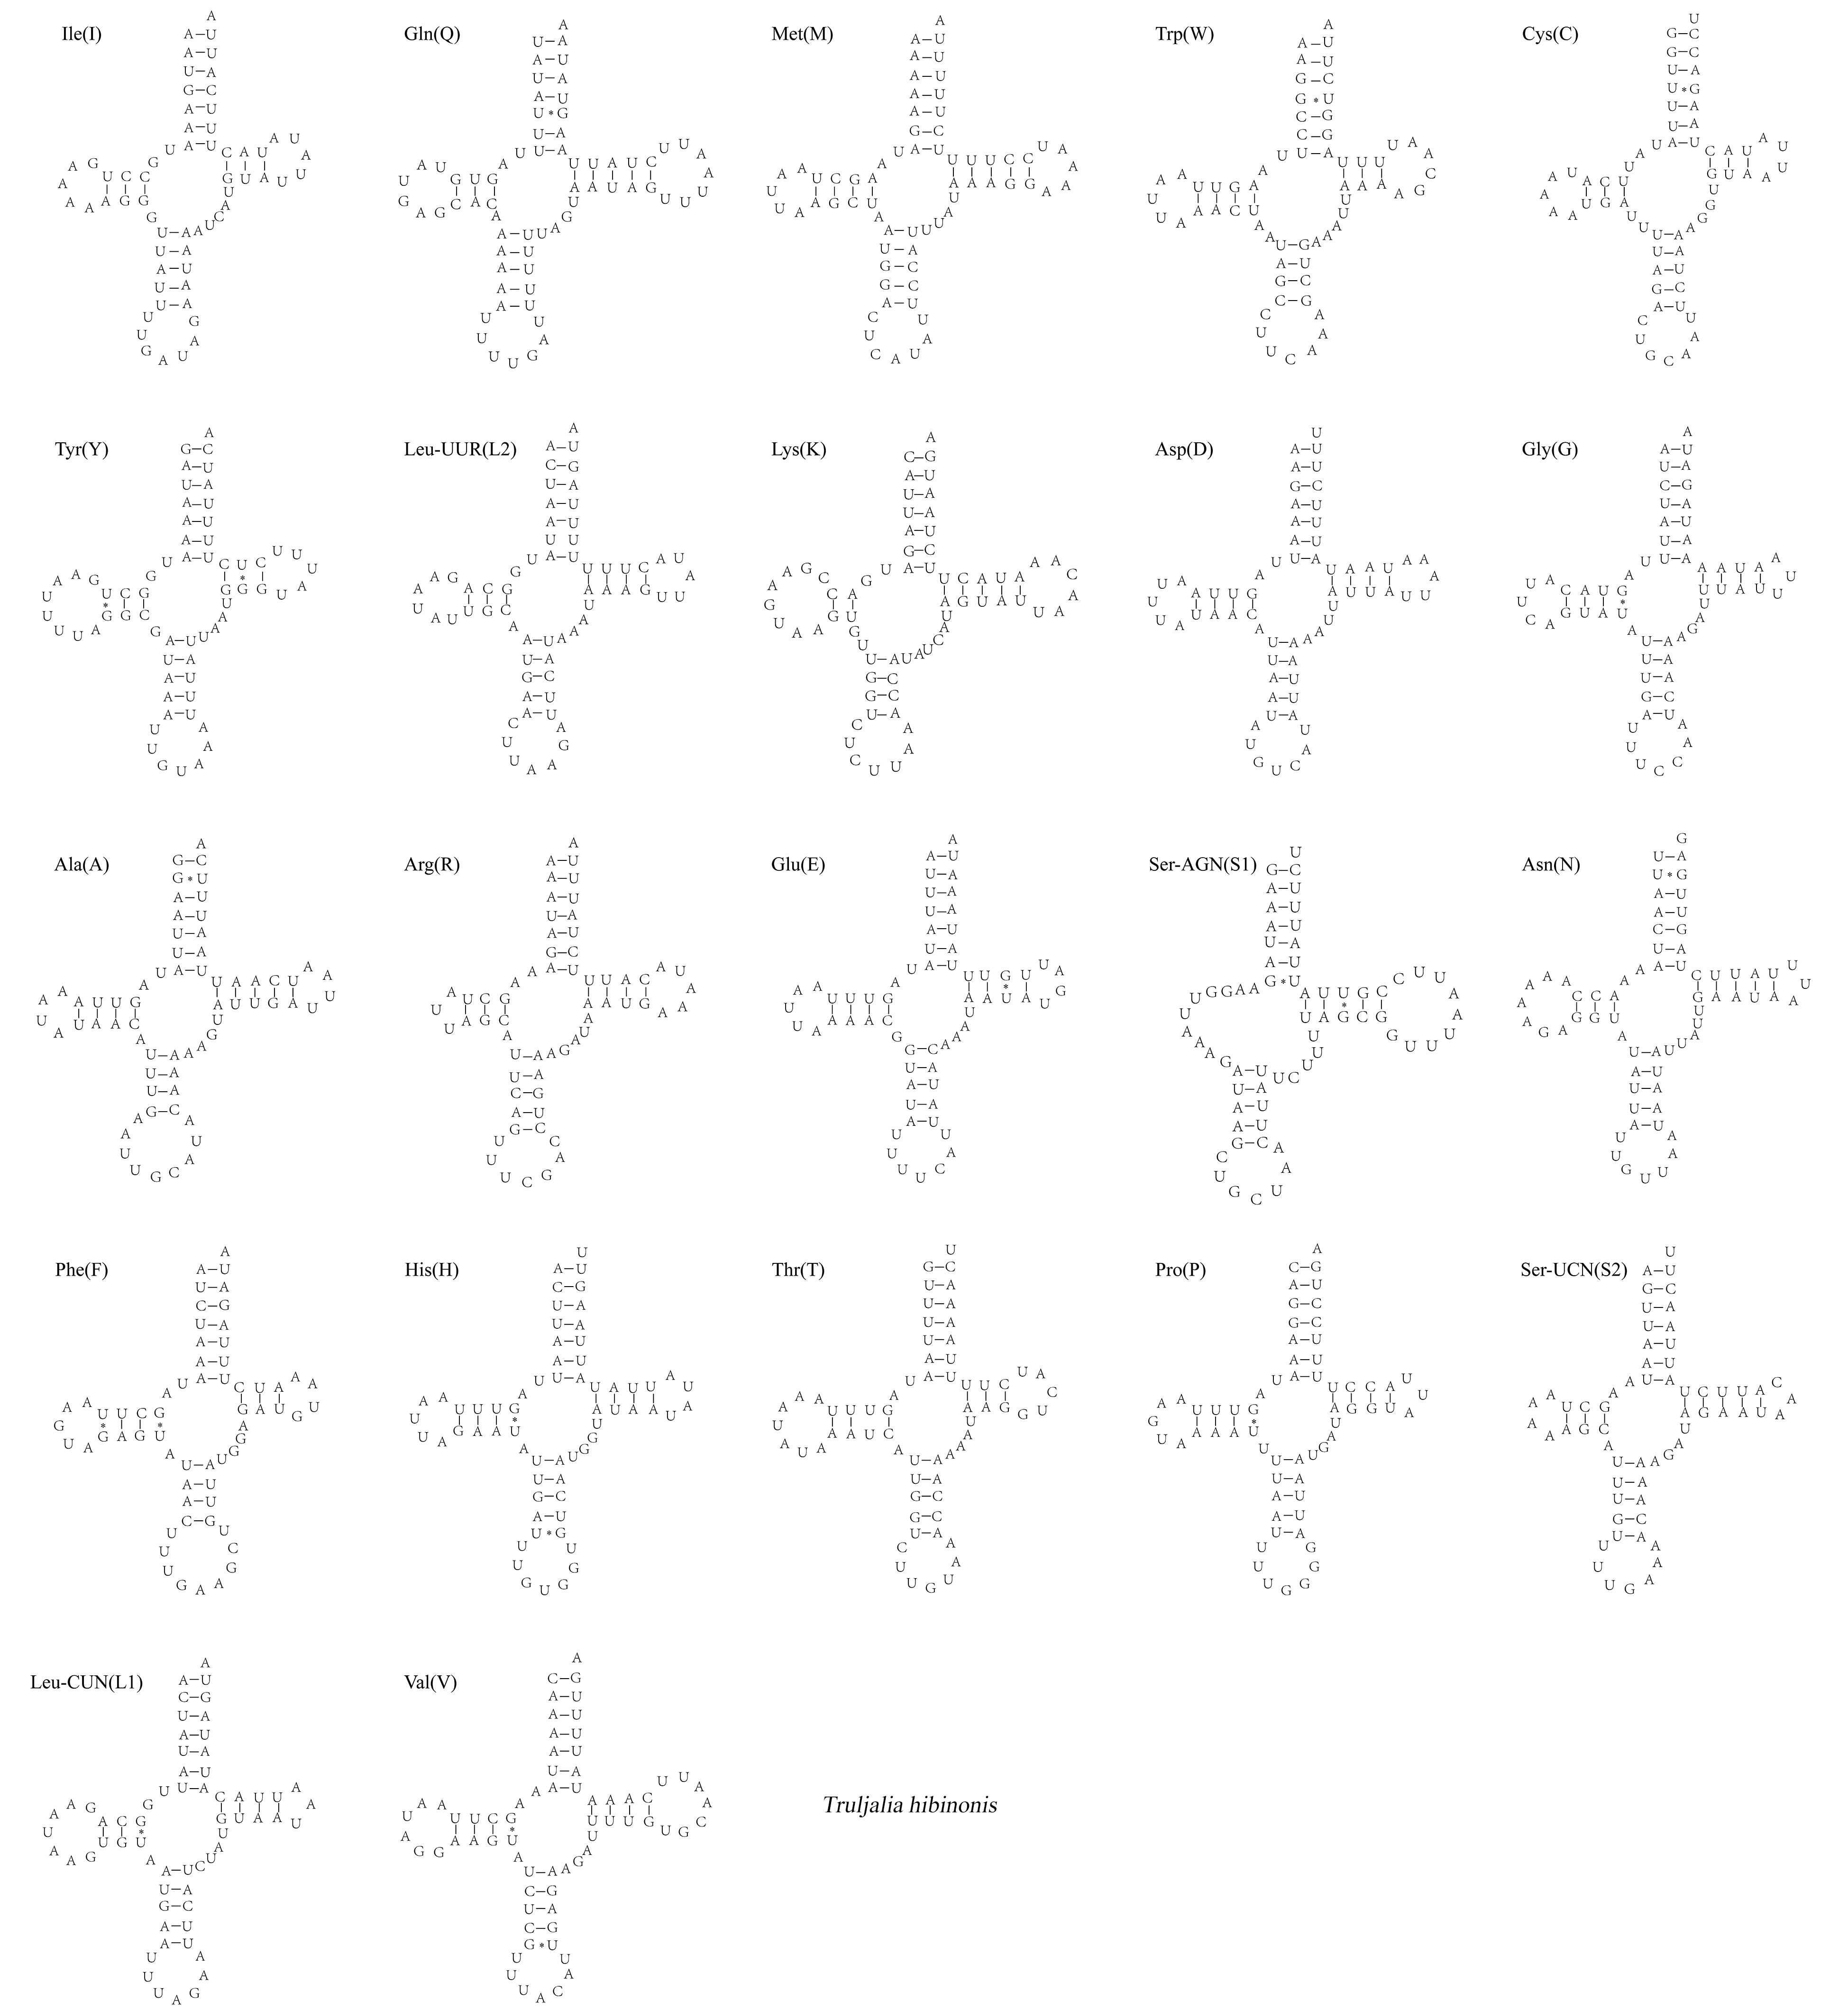


Figure S4. Inferred secondary structure for the tRNA of *T. hibinonis*.


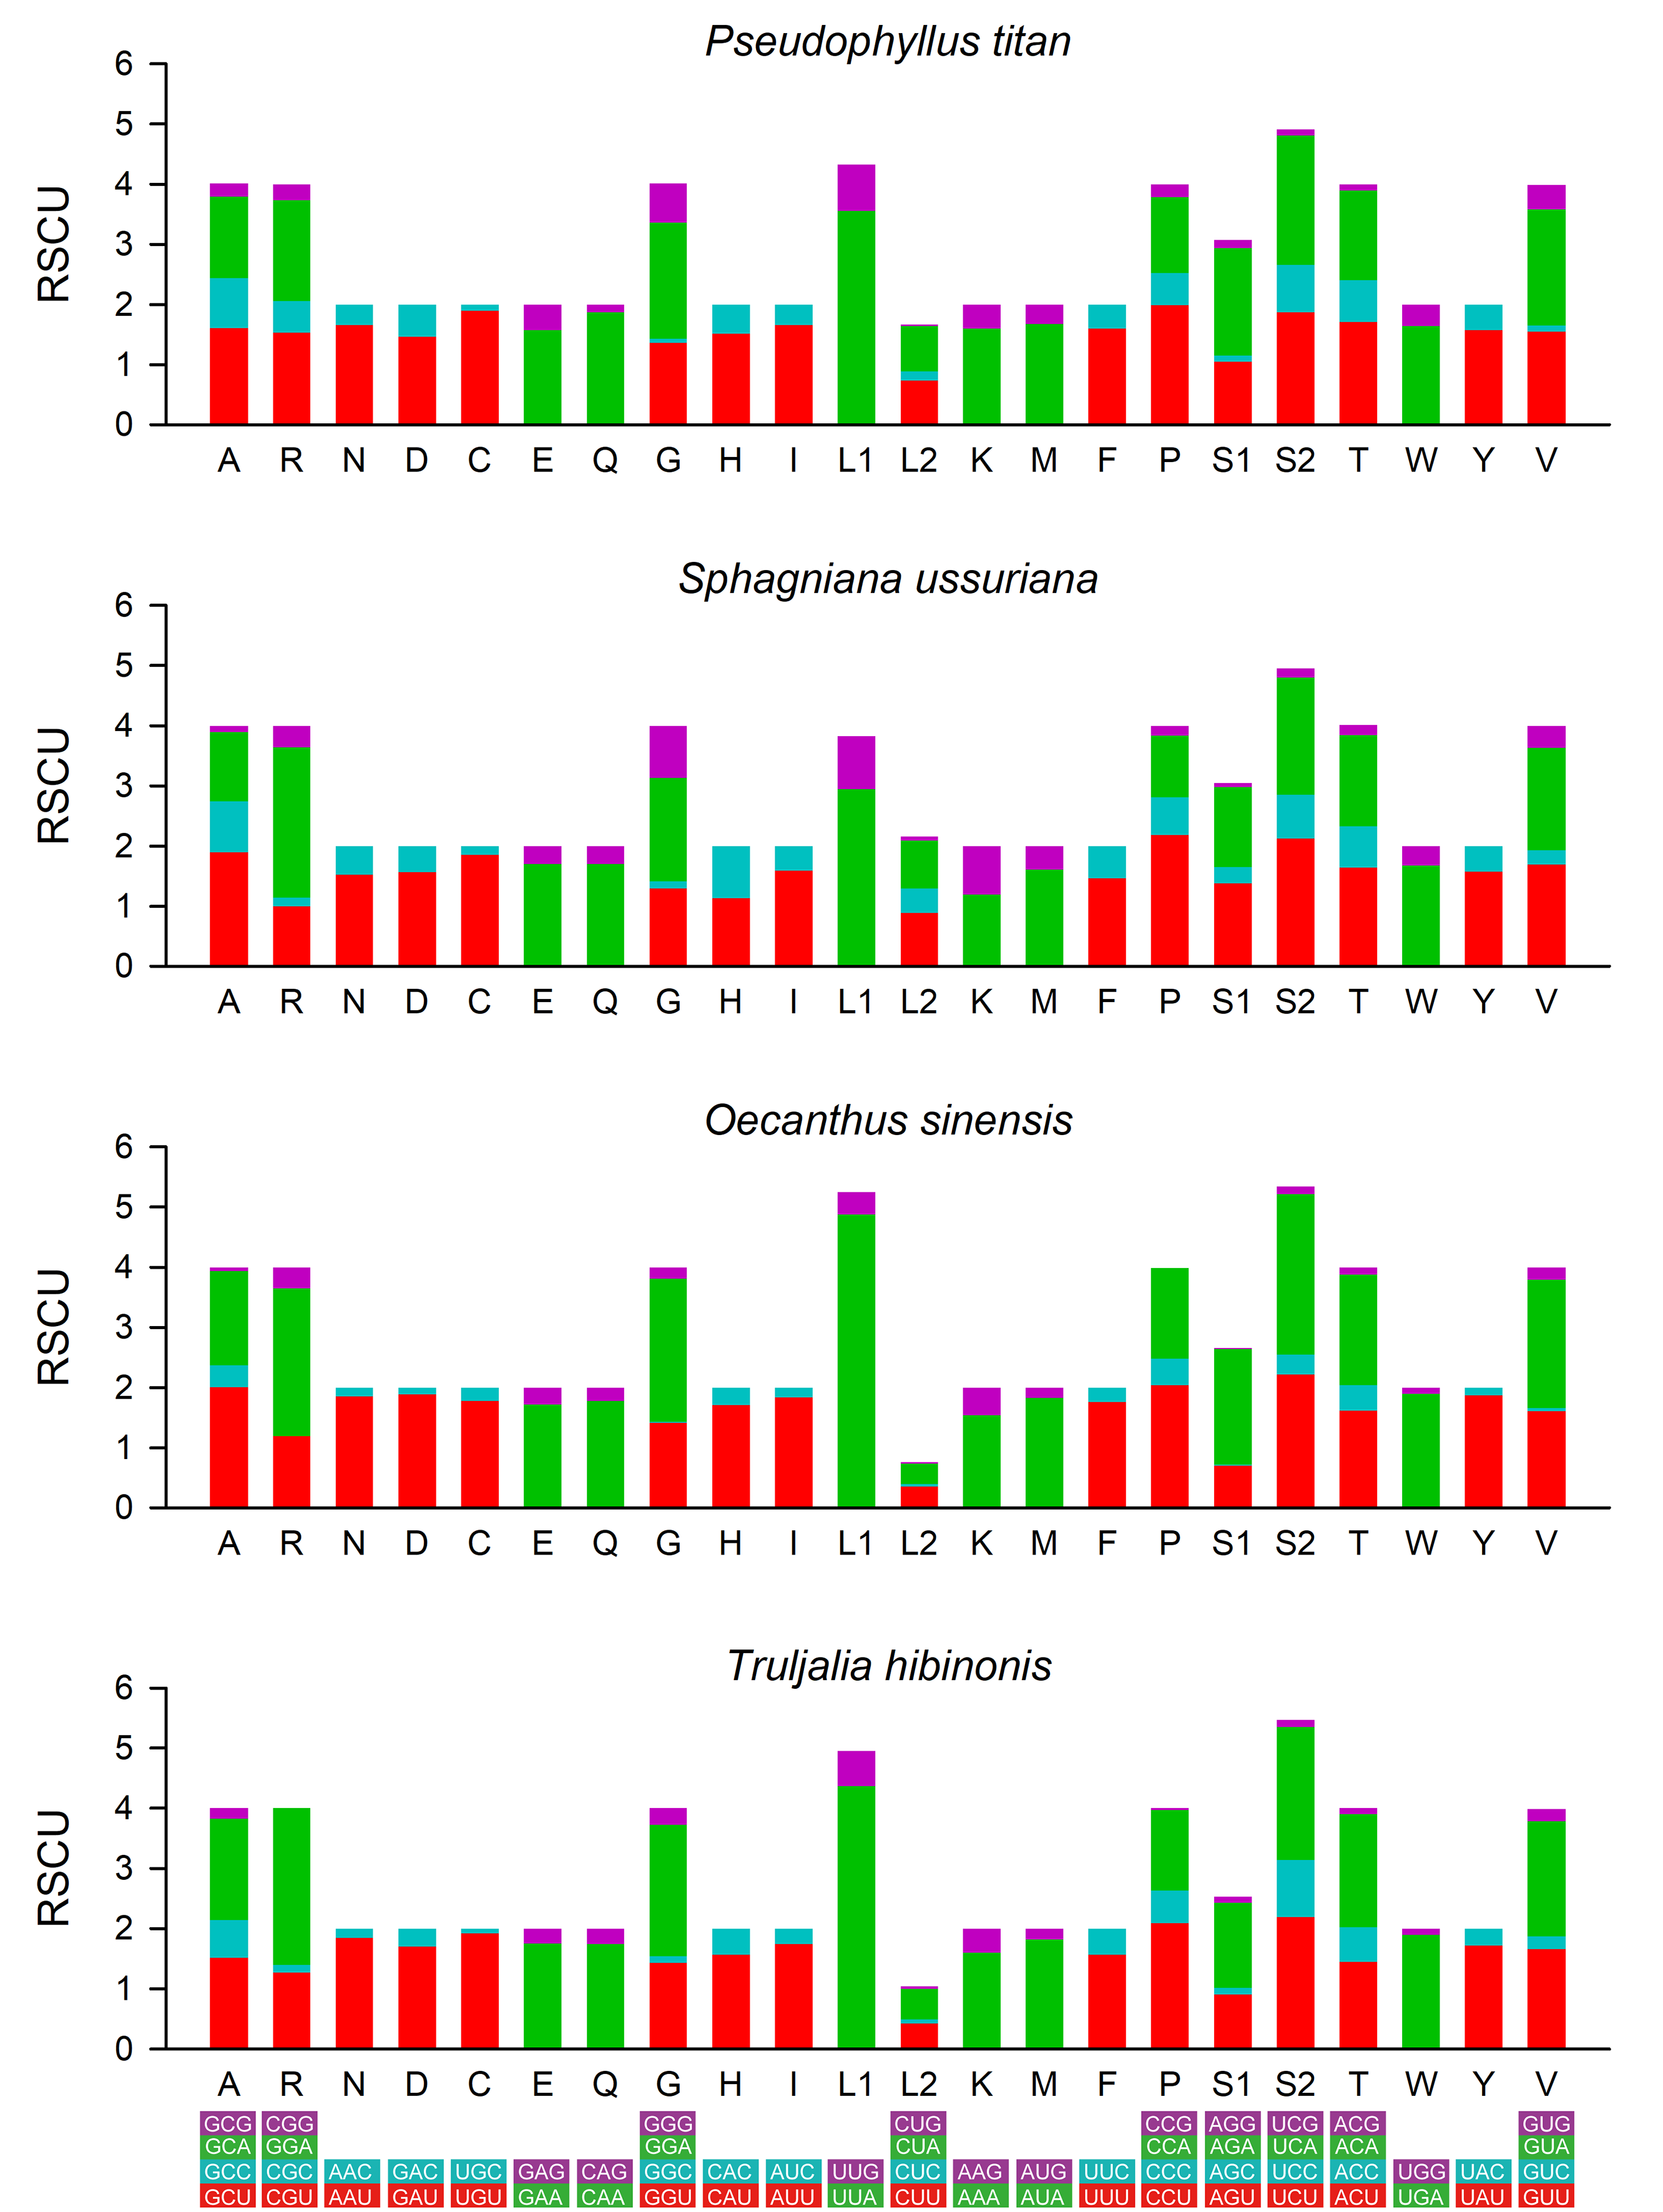


Figure S5. Relative synonymous codon usage (RSCU) in *P. titan*, *S. ussuriana*, *O. sinensis* and *T. hibinonis*. Codon families are provided on the x-axis.


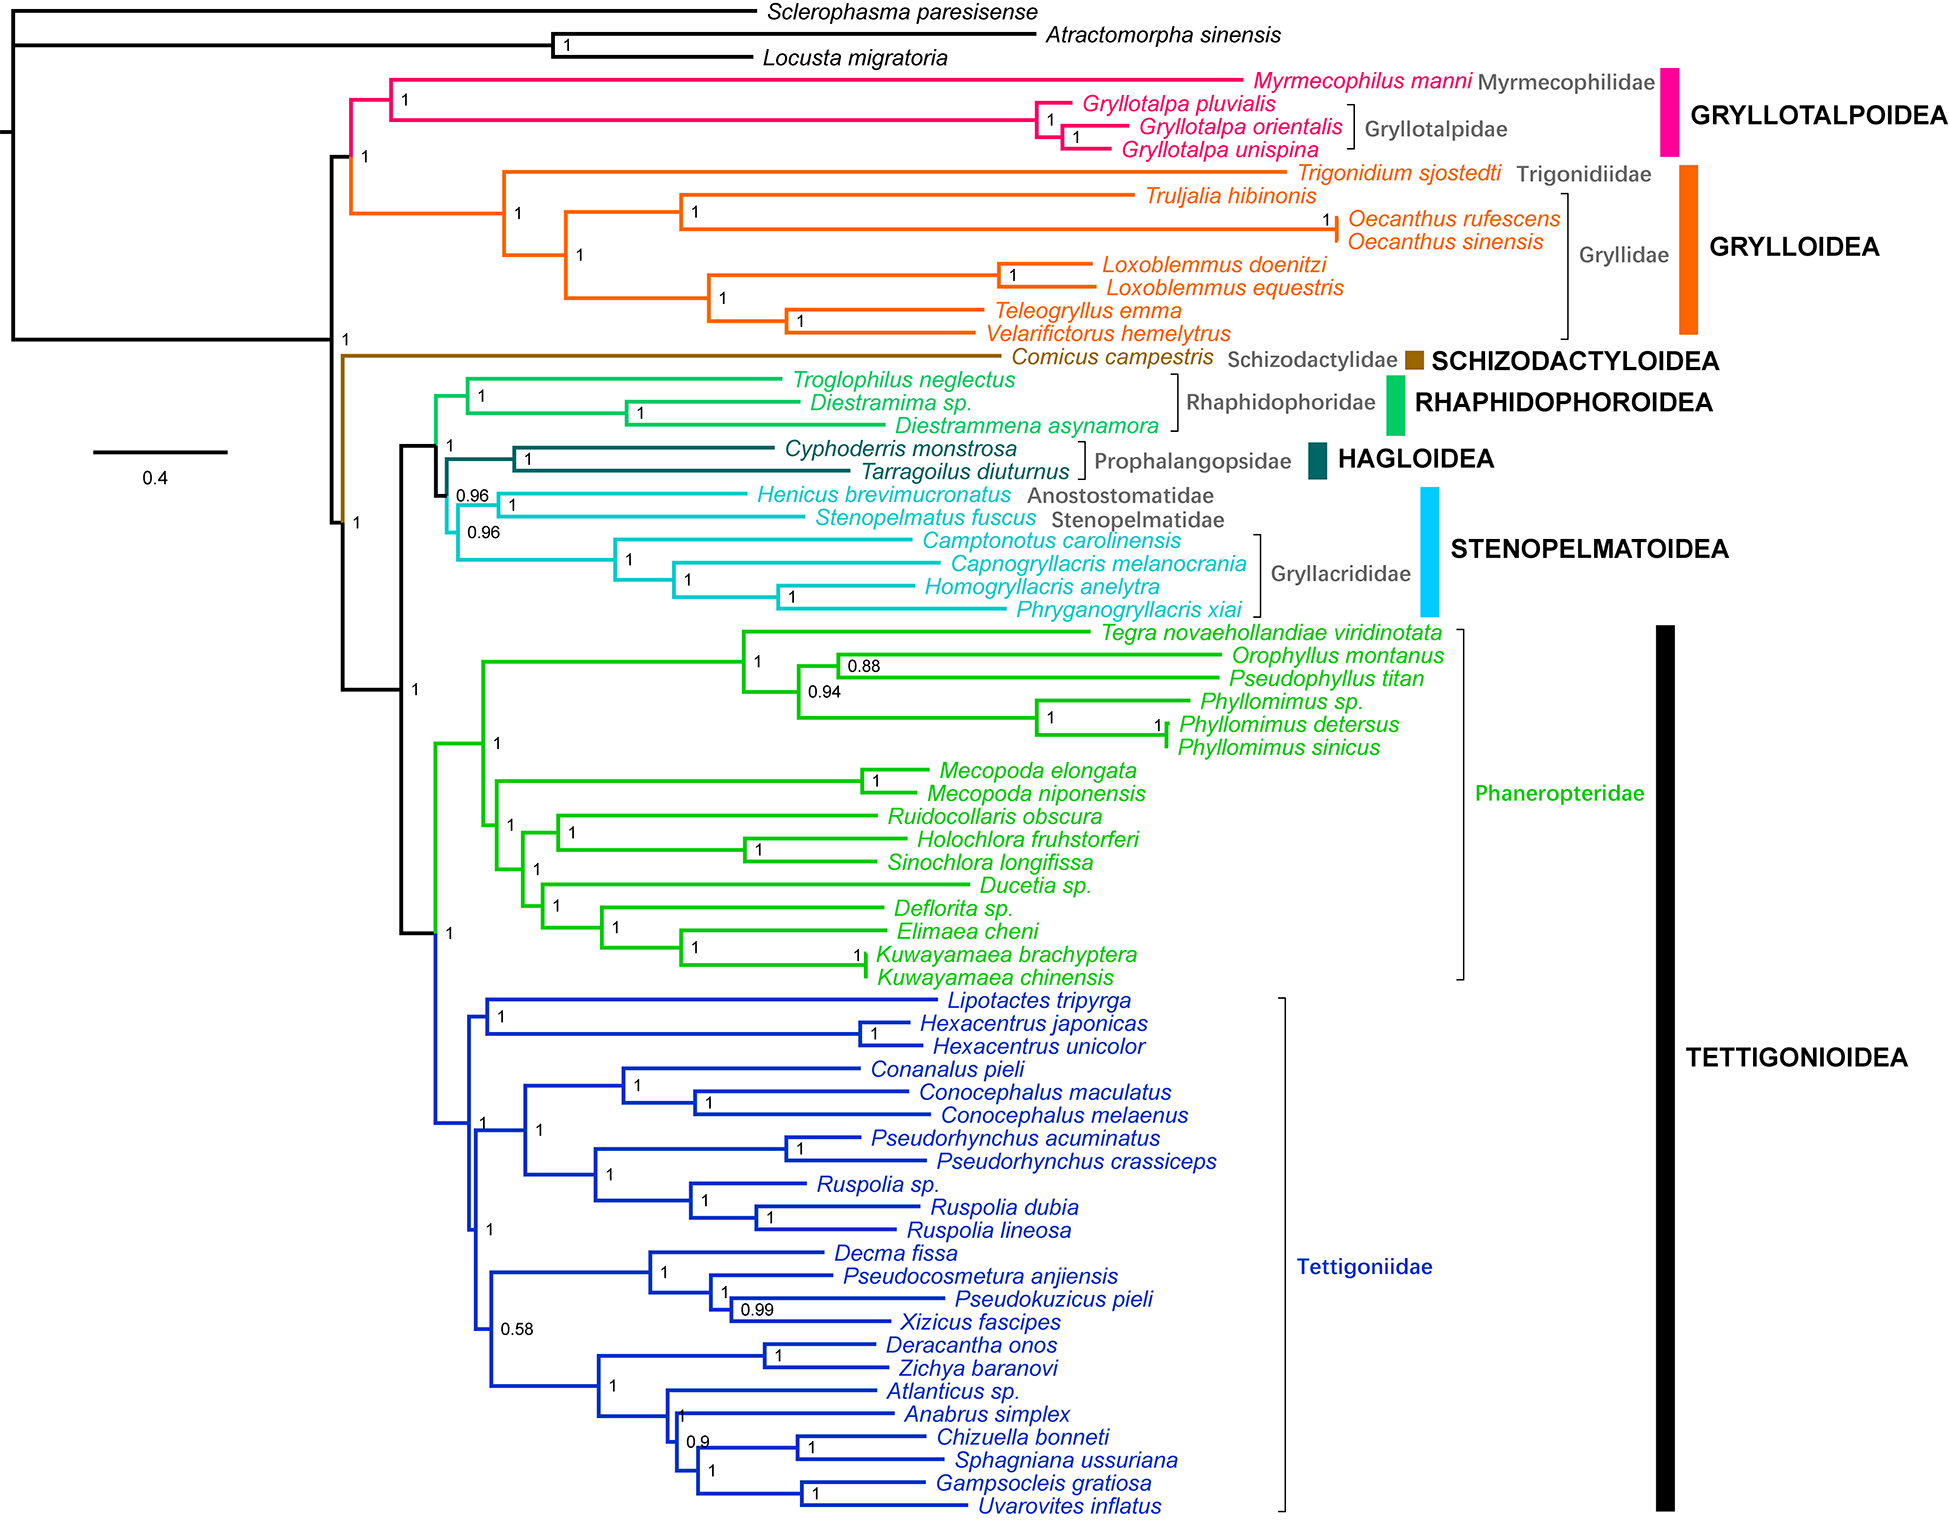


Figure S6. Mitogenome phylogeny of Ensifera based on Bayesian inference analysis using the site-homogeneous model. Values indicated on nodes represent Bayesian posterior probabilities (20 million generations; sample frequency = 1000; burn-in = 25%).


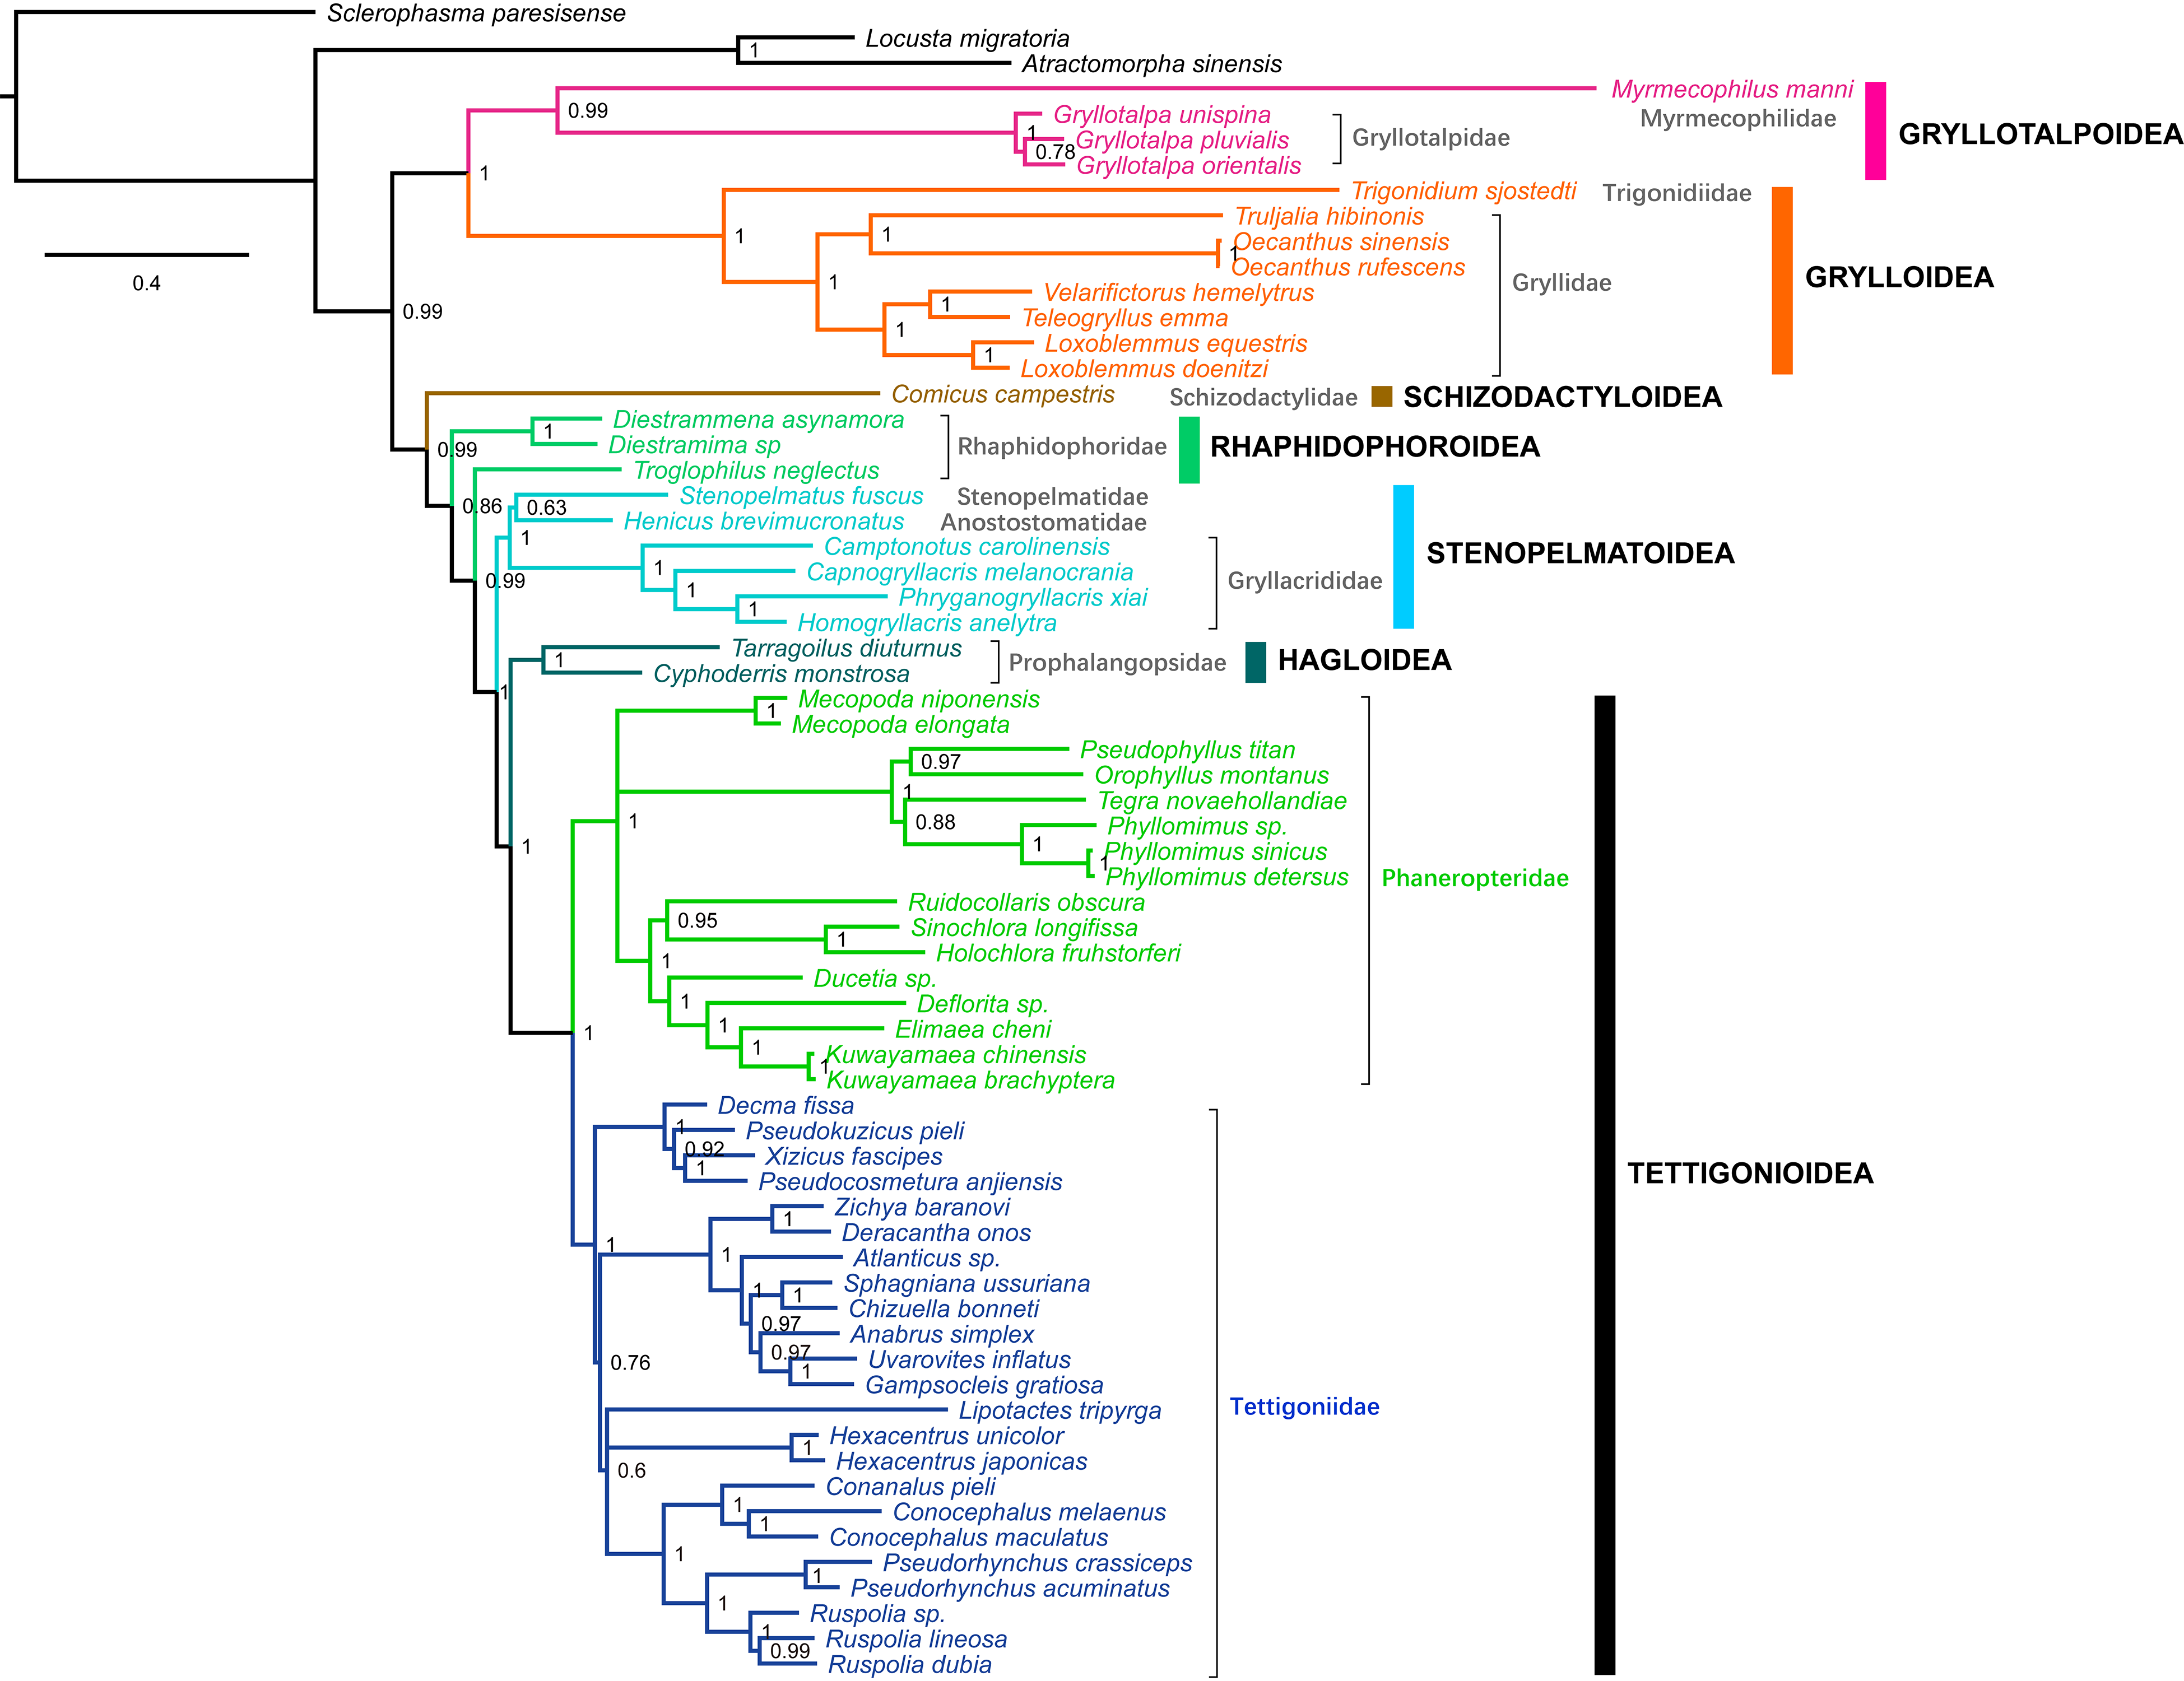


Figure S7. Mitogenome phylogeny of Ensifera based on Bayesian inference analysis using the site-heterogeneous CAT-GTR model. Values indicated on nodes represent Bayesian posterior probabilities.


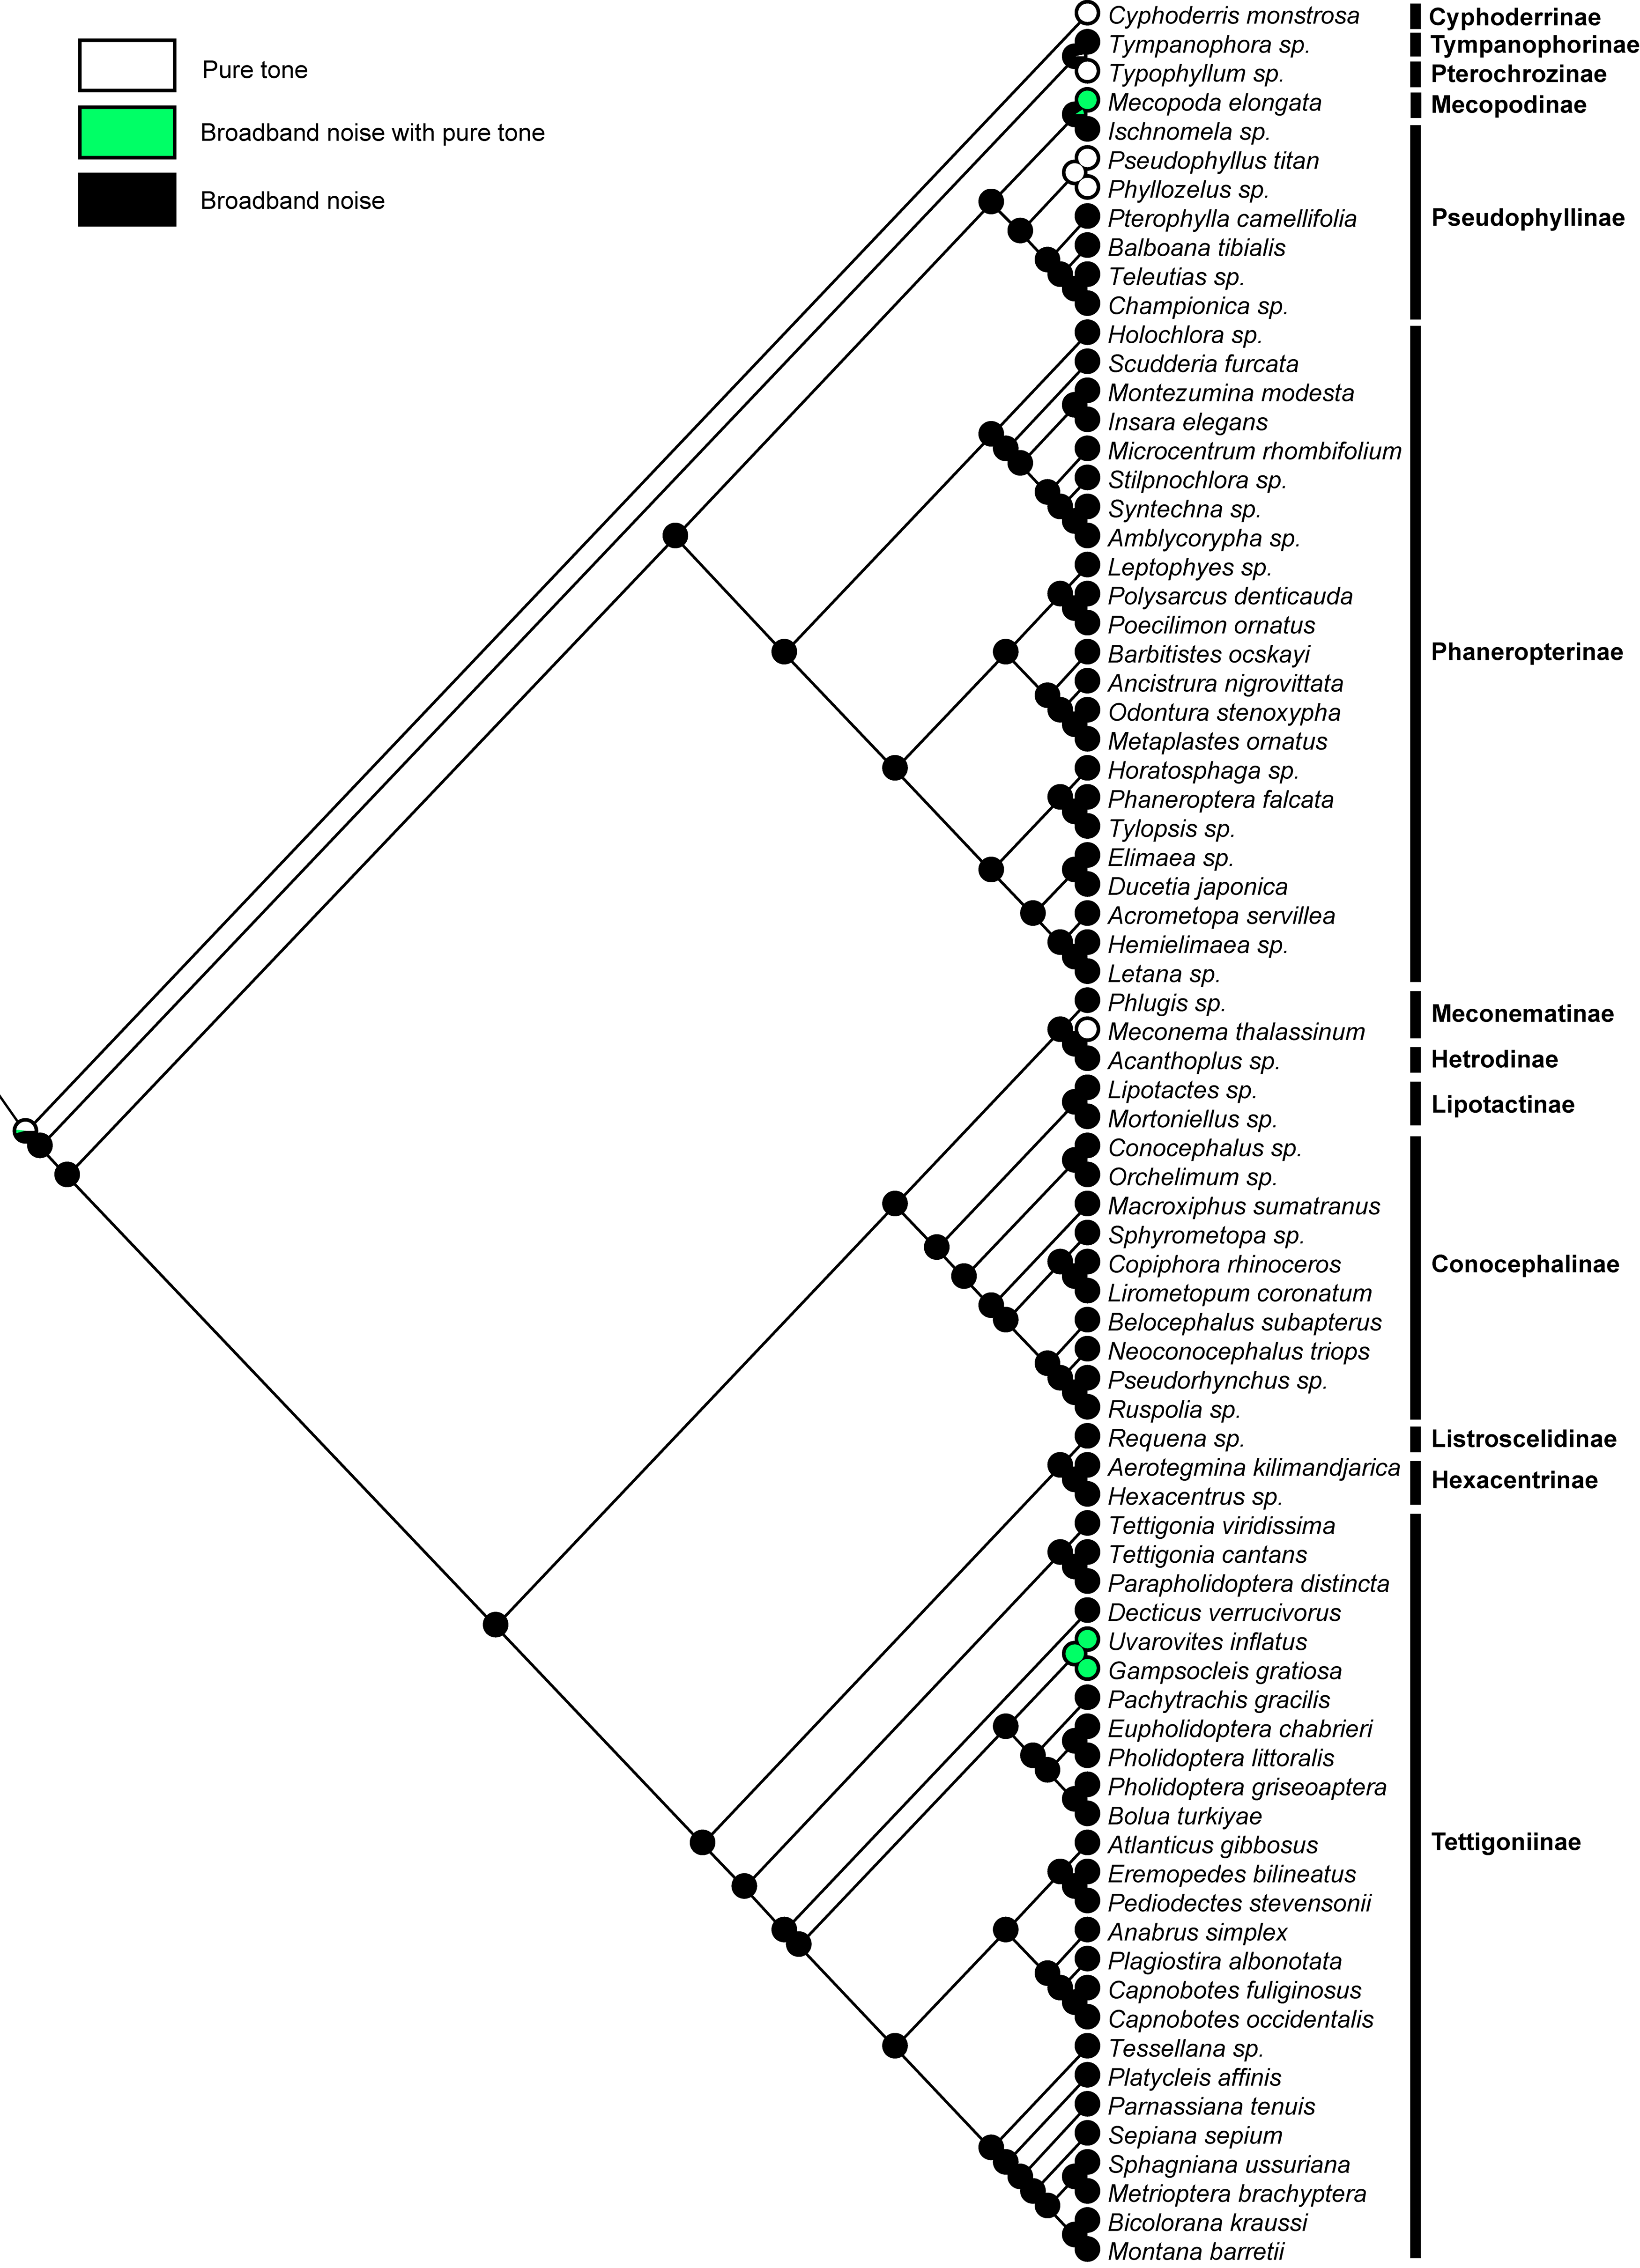


Figure S8. Ancestral character state reconstructions of frequency structure in Tettigoniidae. Each node indicates character states with different colorations and the proportion of the state over all examined trees.


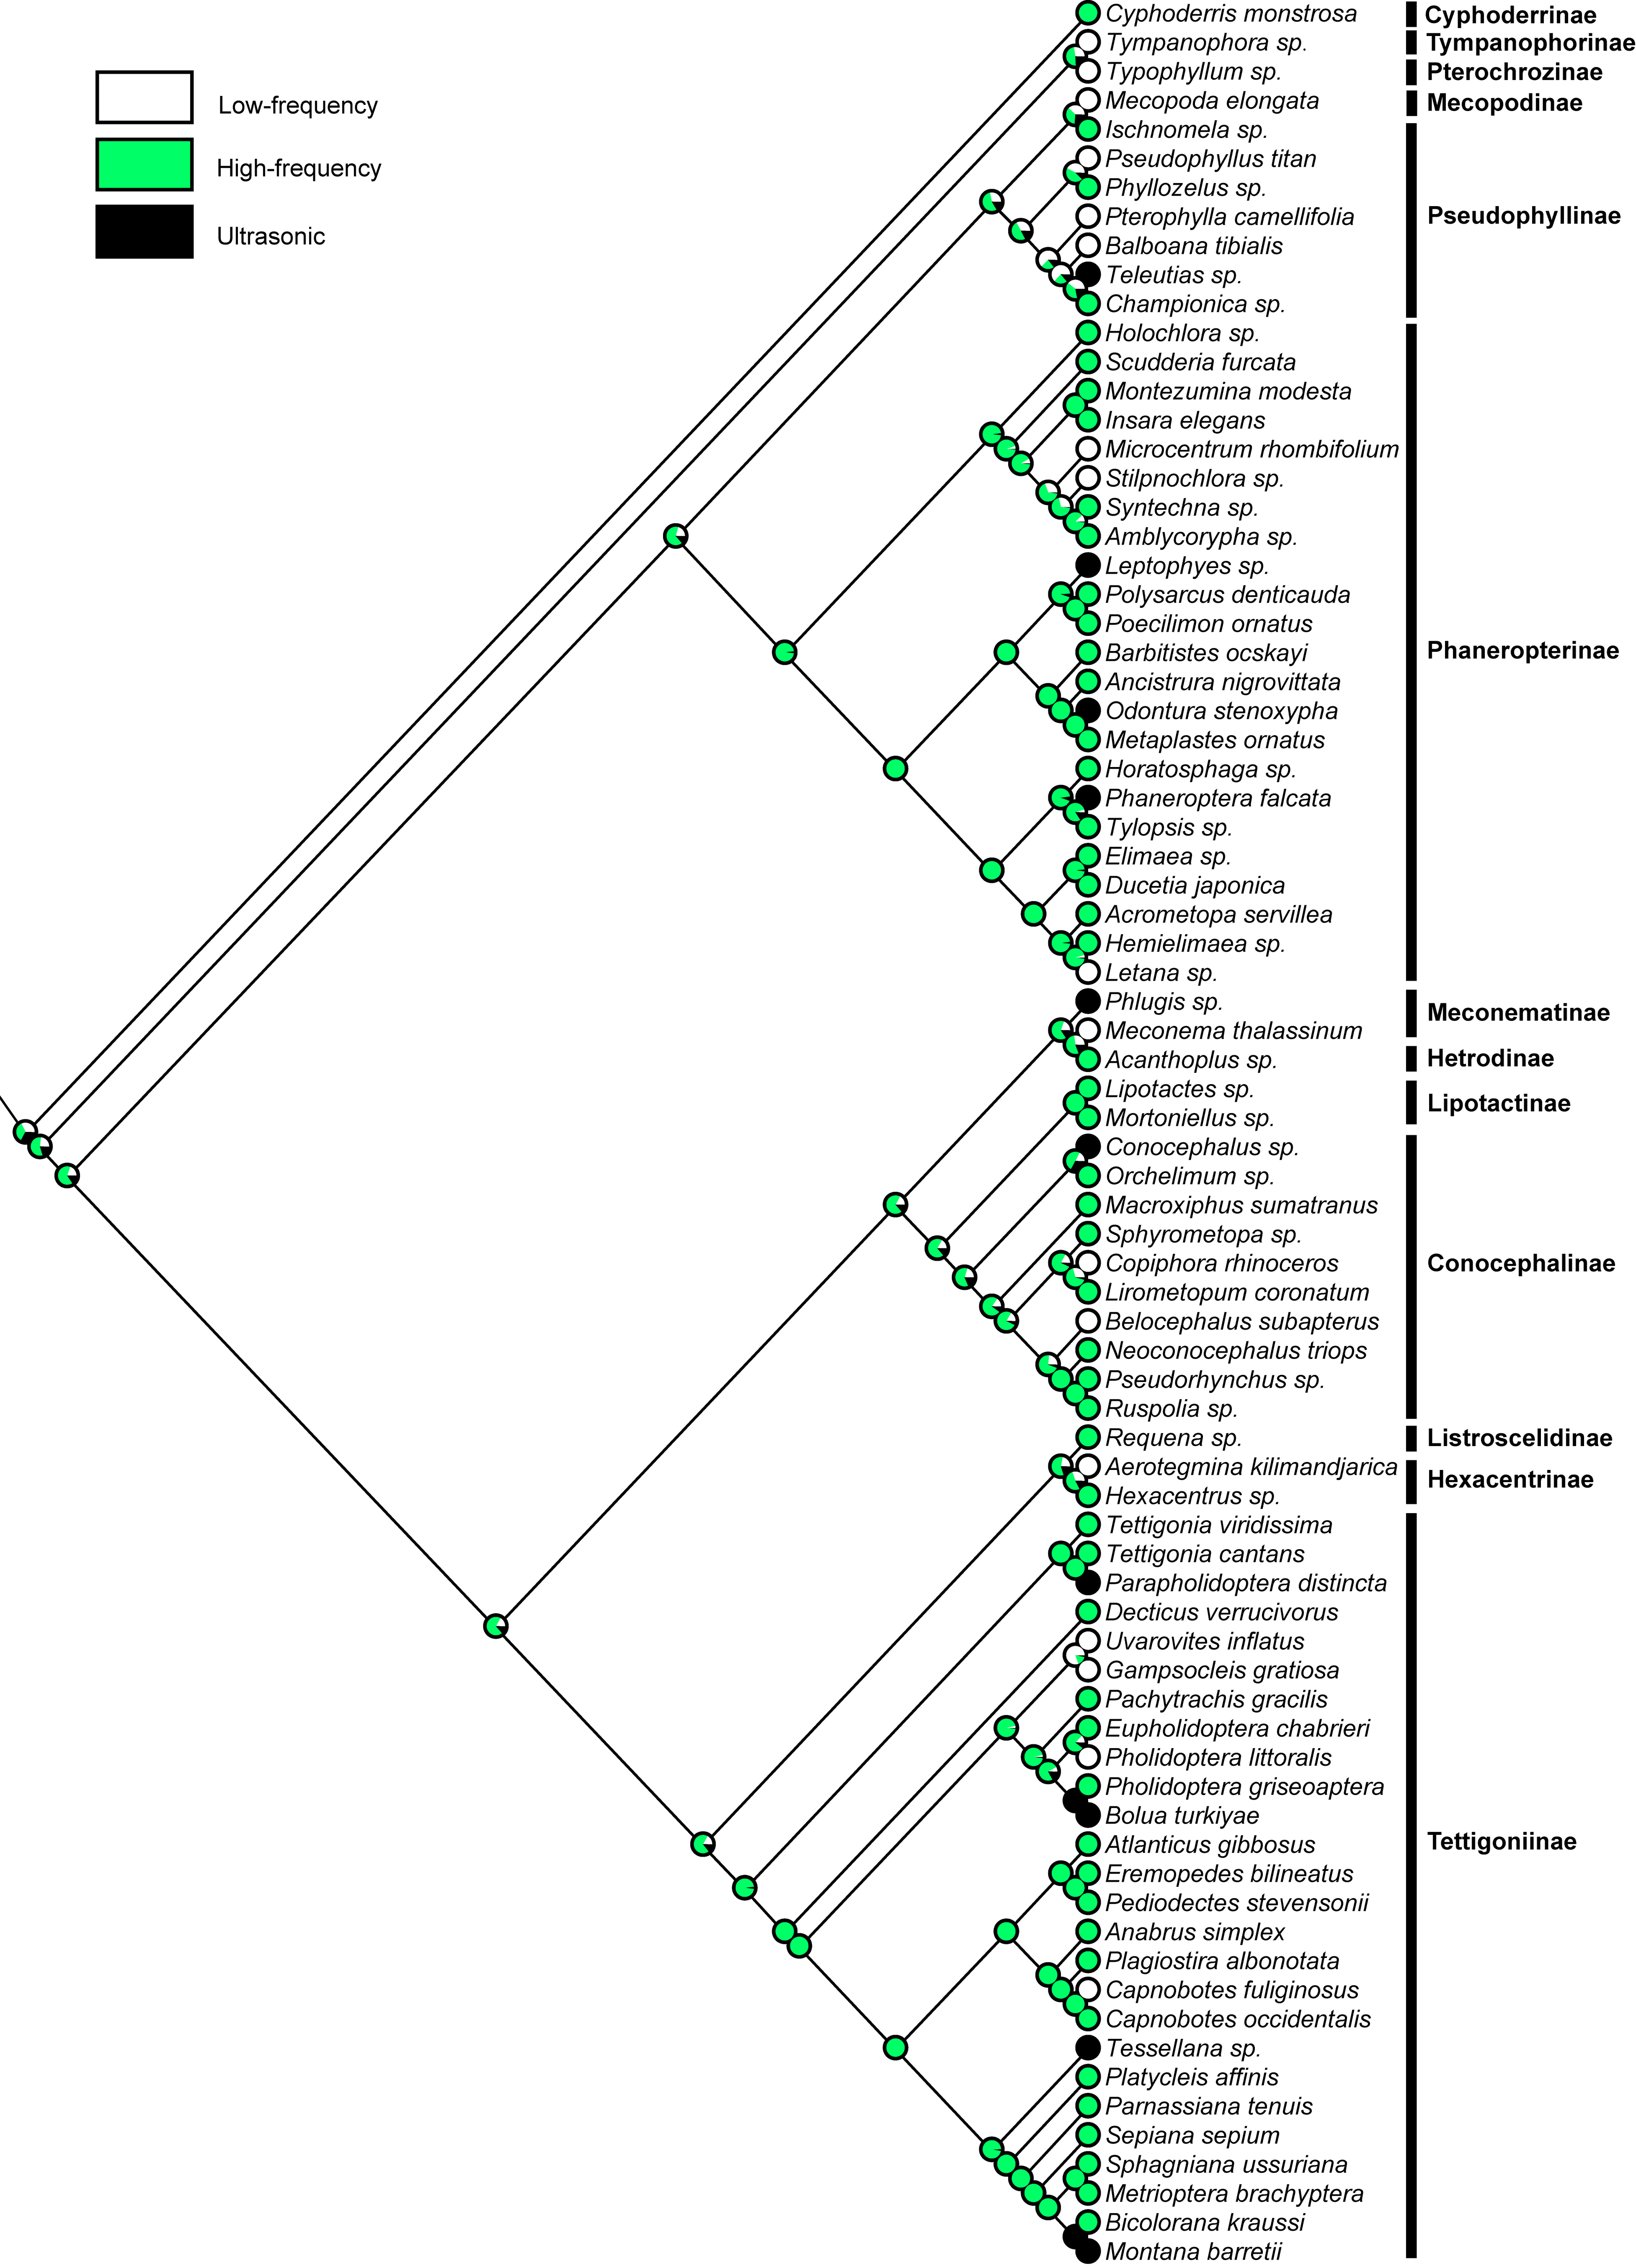


Figure S9. Ancestral character state reconstructions of dominant frequency in Tettigoniidae. Each node indicates character states with different colorations and the proportion of the state over all examined trees.
